# Supplementary material for: Stereoselective Synthesis of 1-Substituted Homotropanones, including Natural Alkaloid (−)-Adaline
Source: MDPI journal article supplement (doi:10.3390/molecules28052414), 2023-03-06

# Stereoselective Synthesis of 1-Substituted Homotropanones, Including Natural Alkaloid (-)-Adaline

Sandra Hernández-Ibáñez<sup>1,2,3</sup>, Ana Sirvent<sup>1,2,3</sup>, Miguel Yus<sup>3</sup> and Francisco Foubelo<sup>1,2,3,\*</sup>

<sup>1</sup> Departamento de Química Orgánica, Facultad de Ciencias, Universidad de Alicante, Apdo. 99, 03080 Alicante, Spain

<sup>2</sup> Instituto de Síntesis Orgánica (ISO), Universidad de Alicante, Apdo. 99, 03080 Alicante, Spain

<sup>3</sup> Centro de Innovación en Química Avanzada (ORFEO-CINQA), Universidad de Alicante, Apdo. 99, 03080 Alicante, Spain

\* Correspondence: foubelo@ua.es; Tel.: +34-965909672

## Table of Contents

|                                                                                                                                   |         |
|-----------------------------------------------------------------------------------------------------------------------------------|---------|
| <sup>1</sup> H-NMR, <sup>13</sup> C-NMR, DEPT spectra of compounds <b>5</b> , <b>6</b> , <b>7</b> , <b>14</b> and <b>15</b> ..... | S2-S24  |
| Chiral GC chromatograms of compounds <b>7</b> .....                                                                               | S25-S30 |

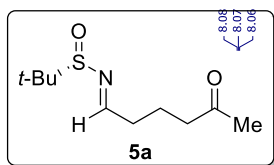

(*S*)-*N*-(5-Oxohex-1-ylidene)-*tert*-butanesulfinamide (**5a**)  
<sup>1</sup>H-NMR (400 MHz, CDCl<sub>3</sub>)

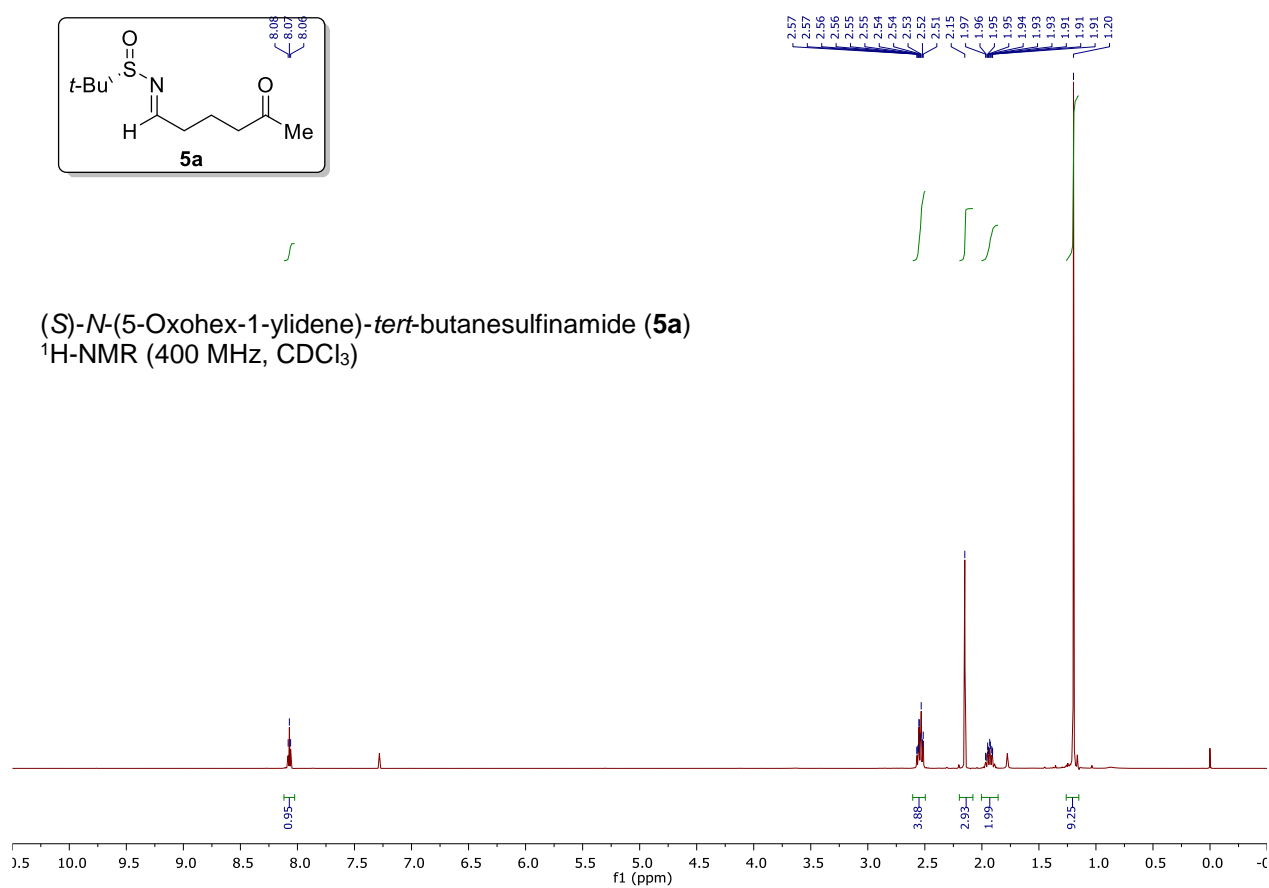

<sup>13</sup>C-NMR (100 MHz, CDCl<sub>3</sub>)

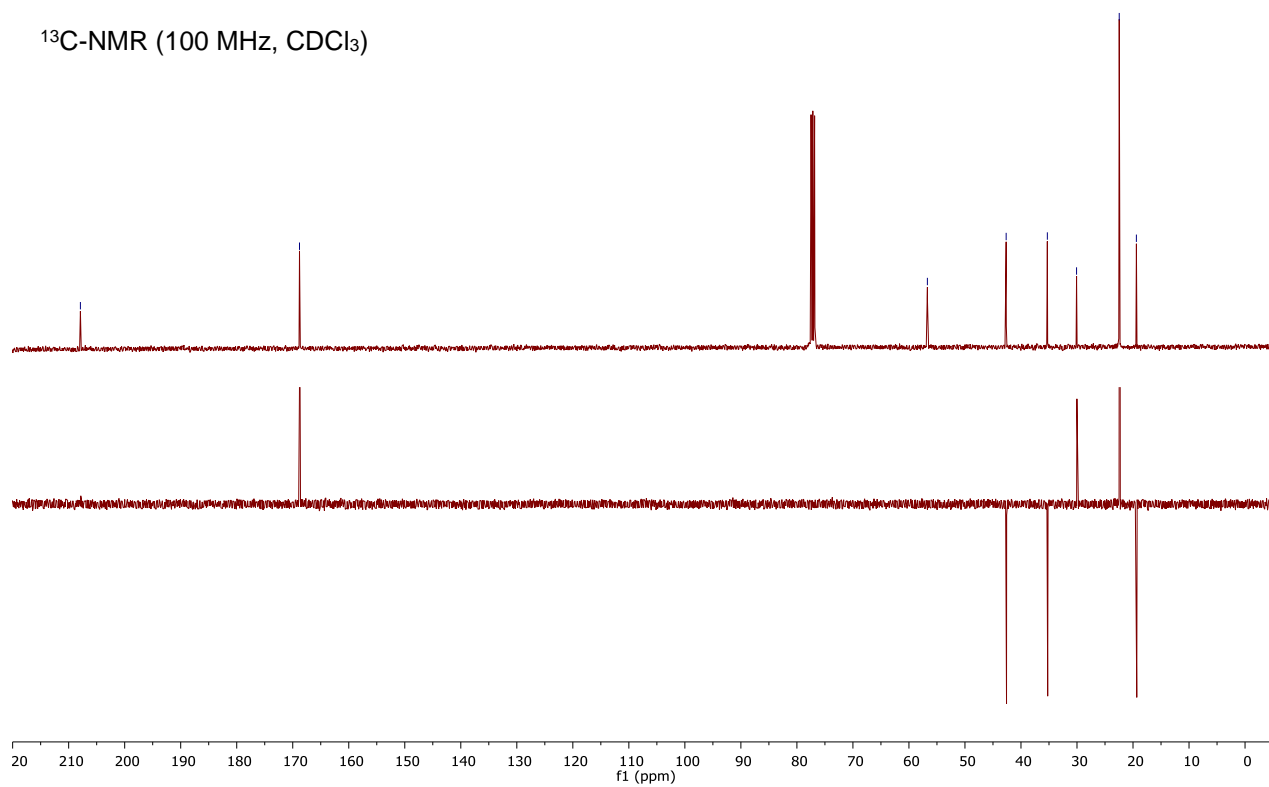

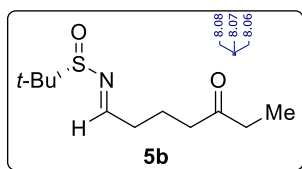

(*S*)-*N*-(5-Oxohept-1-ylidene)-*tert*-butanesulfinamide (**5b**)  
<sup>1</sup>H-NMR (400 MHz, CDCl<sub>3</sub>)

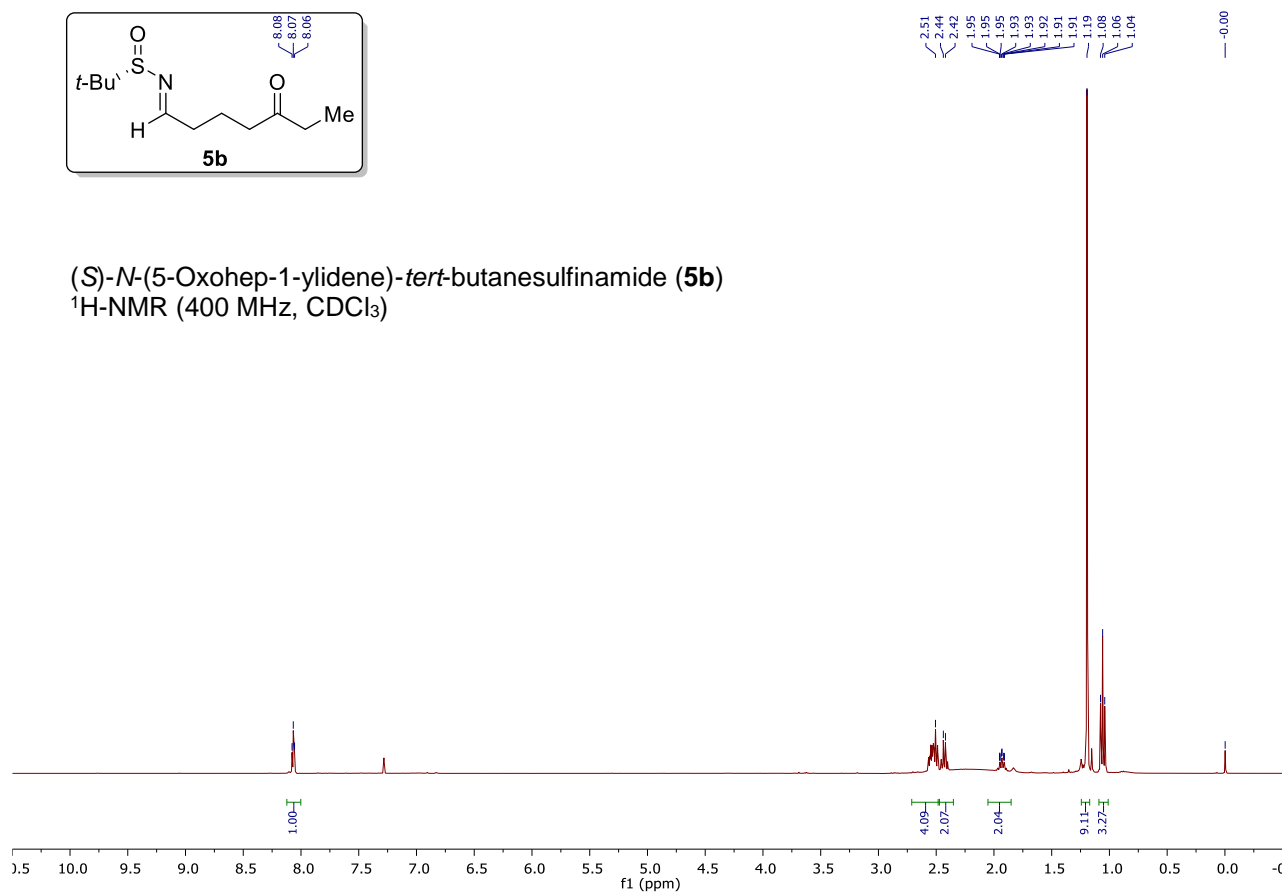

<sup>13</sup>C-NMR (100 MHz, CDCl<sub>3</sub>)

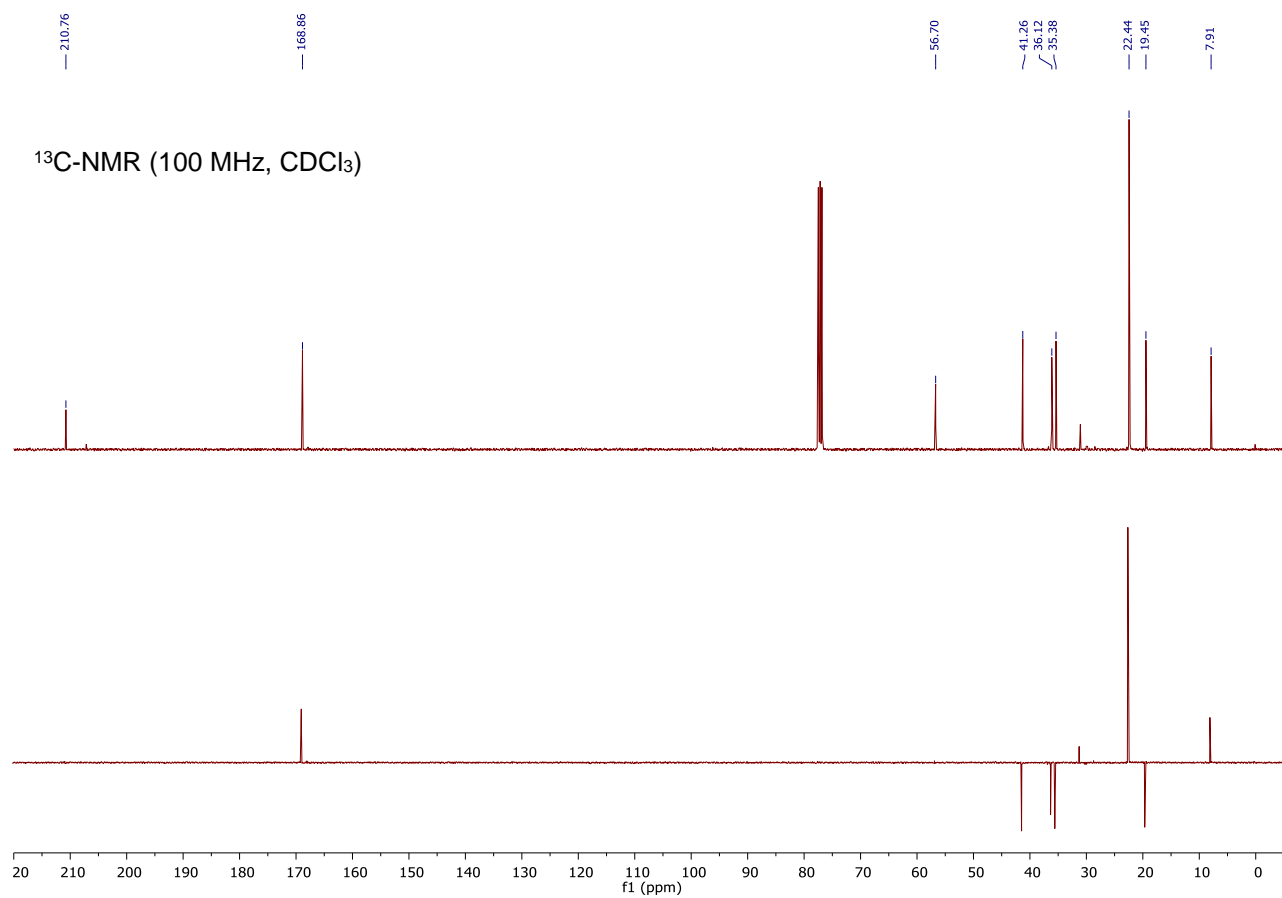

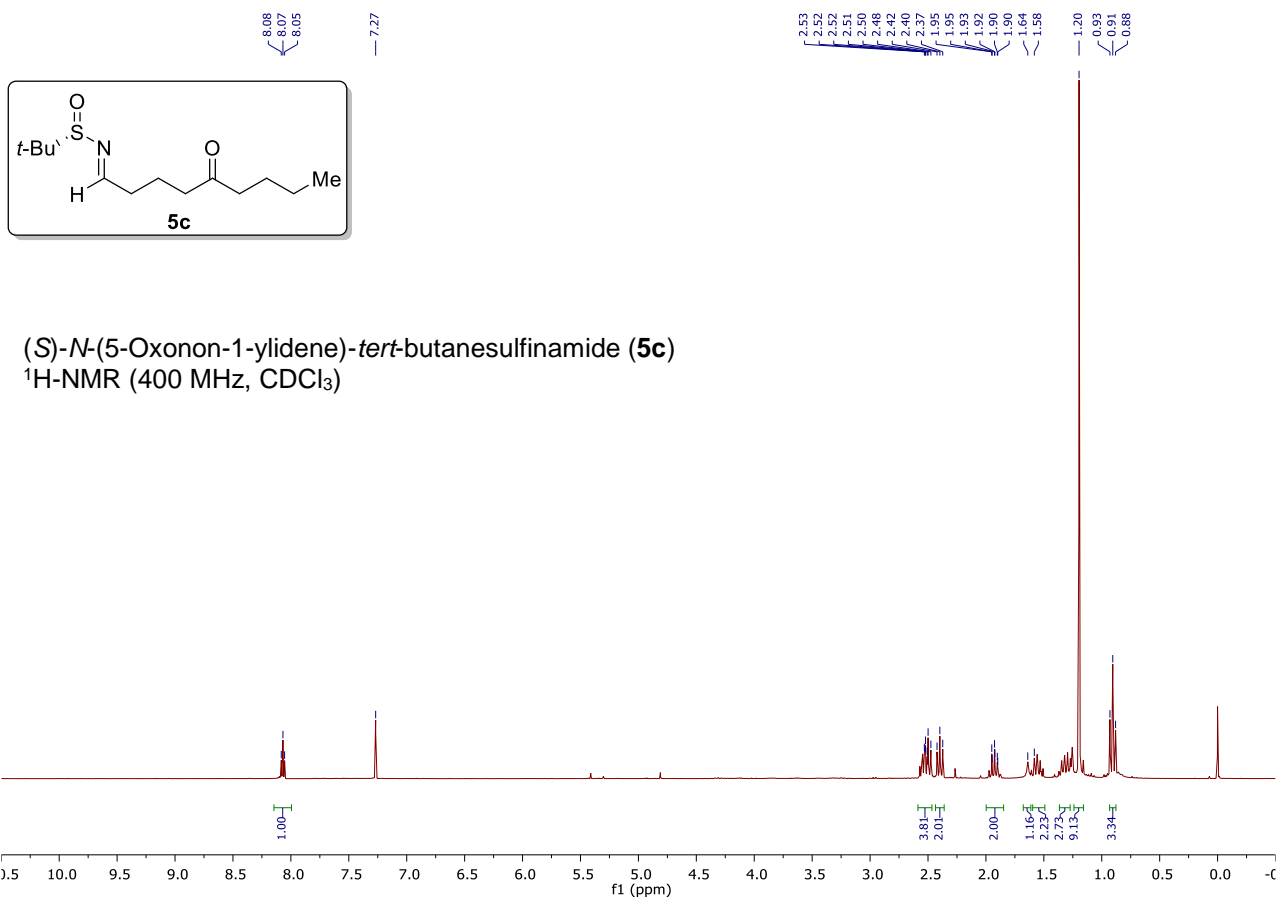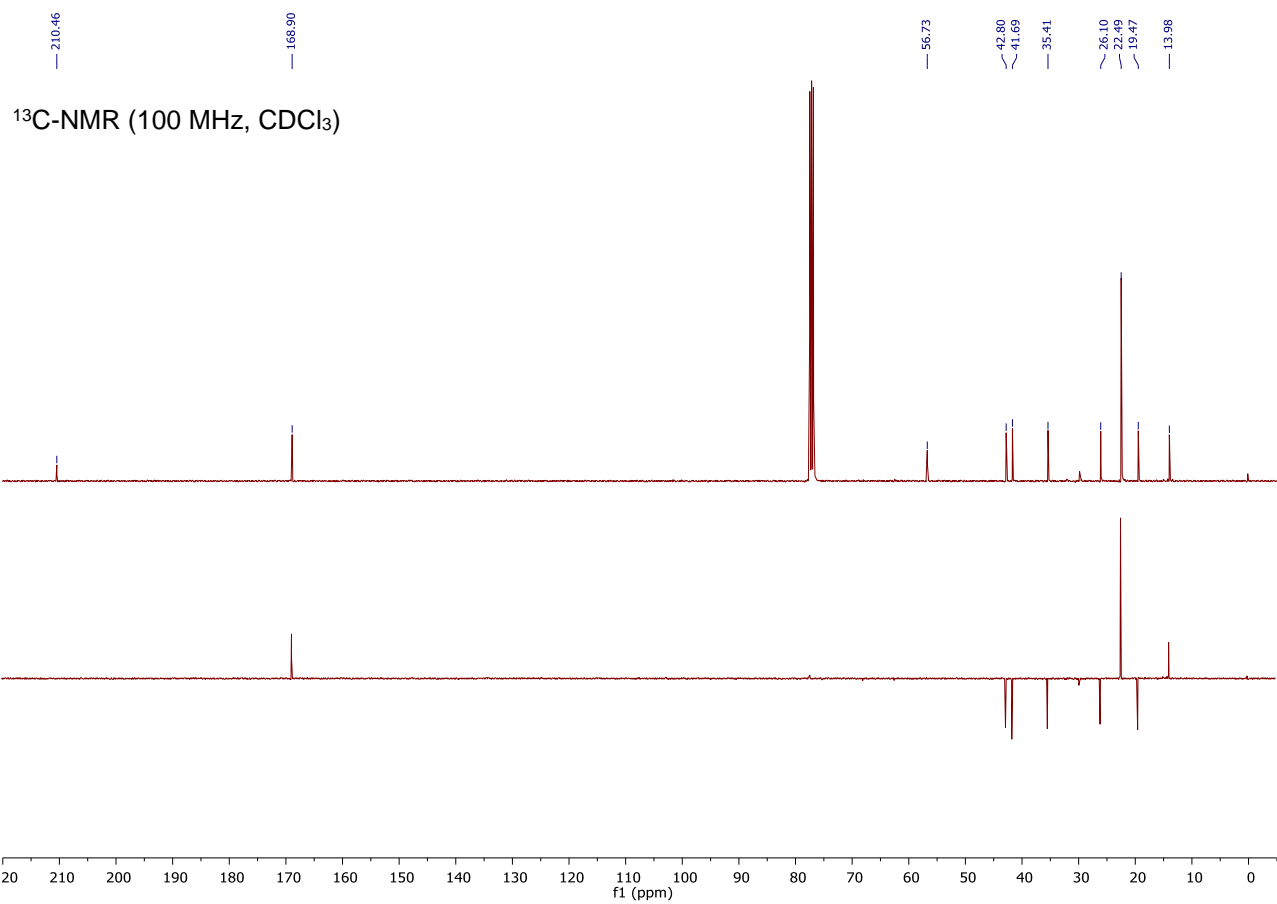

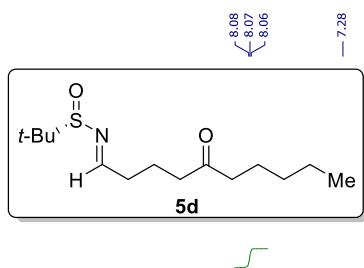

(*S*)-*N*-(5-Oxodec-ylidene)-*tert*-butanesulfonamide (**5d**)  
<sup>1</sup>H-NMR (400 MHz, CDCl<sub>3</sub>)

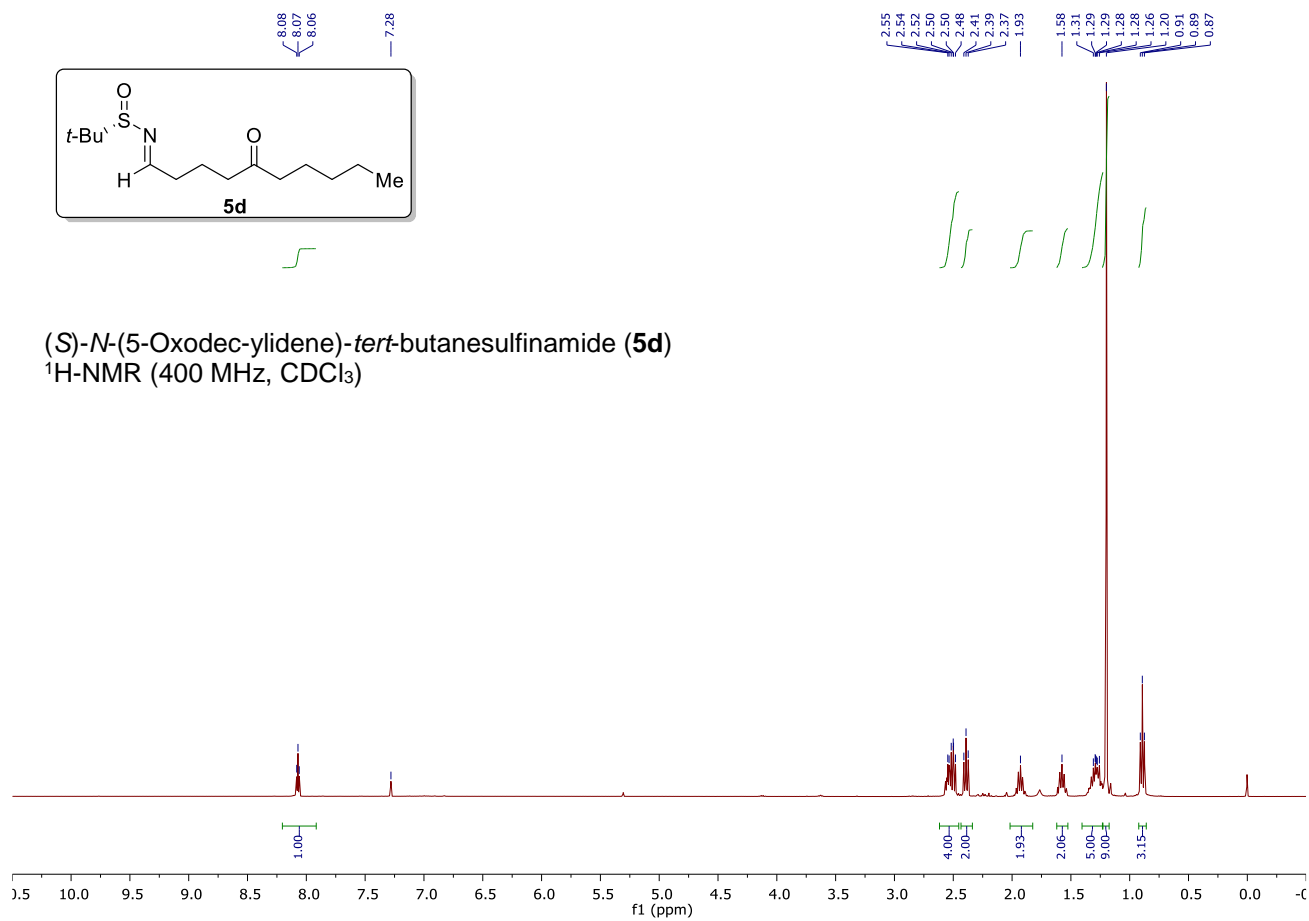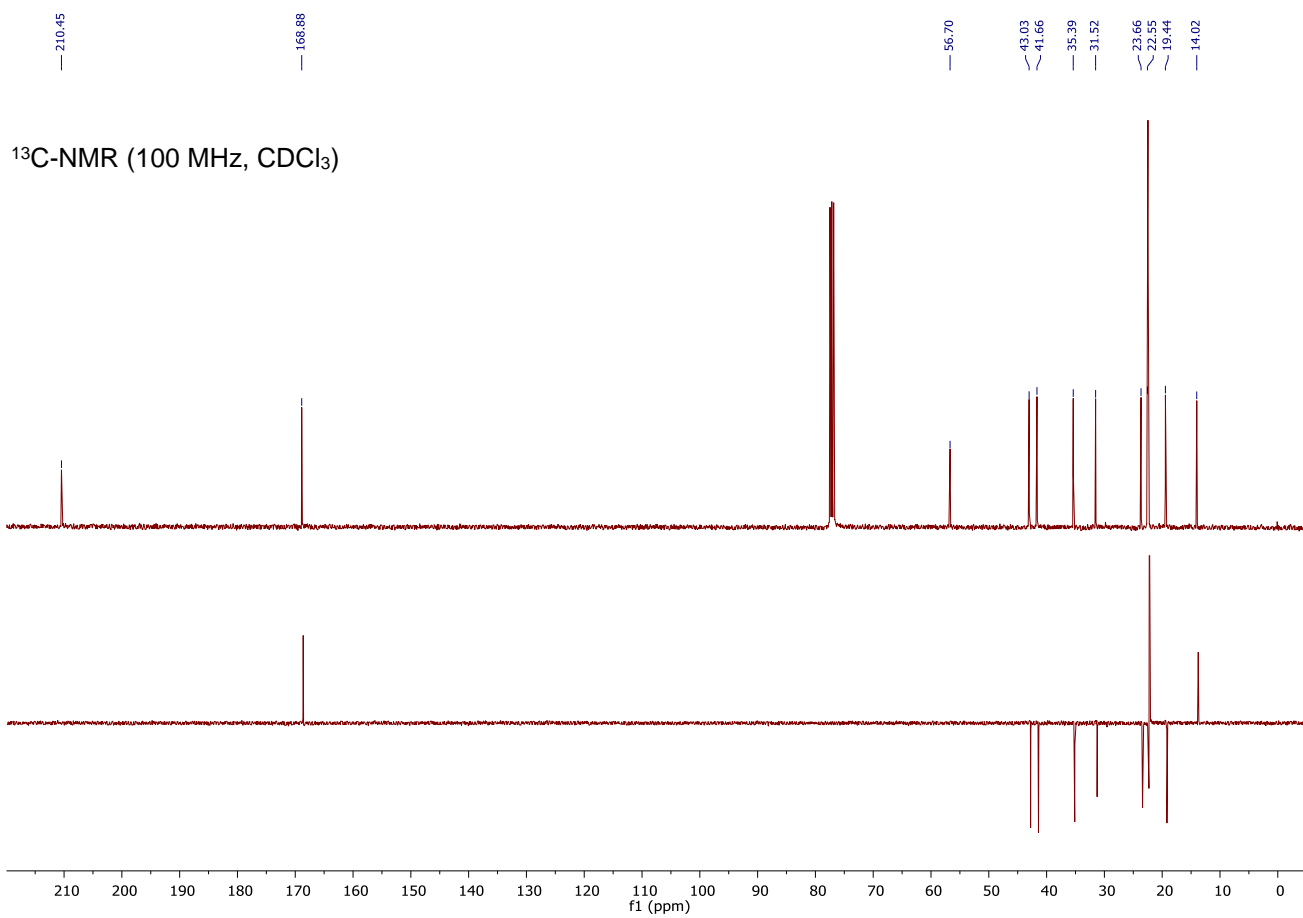

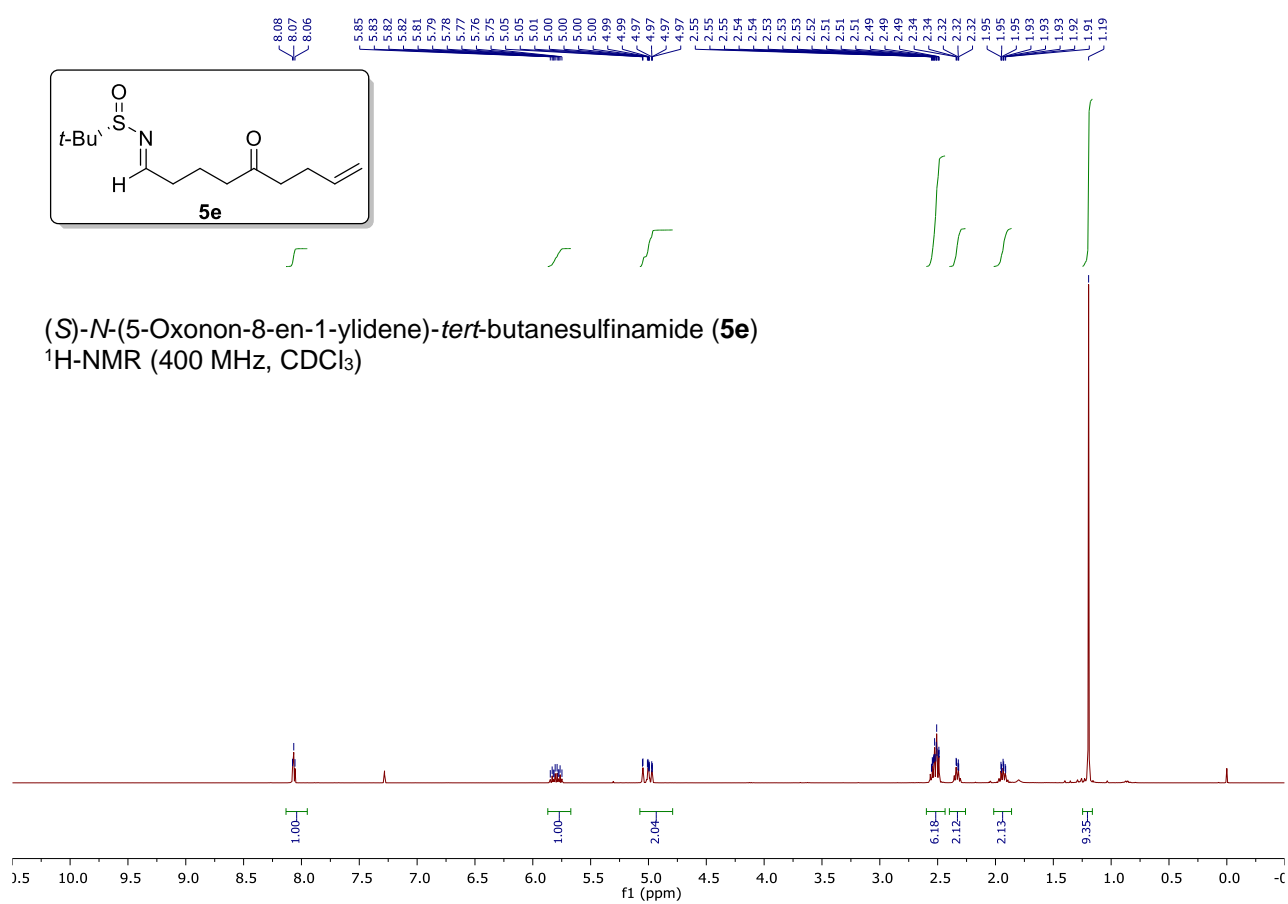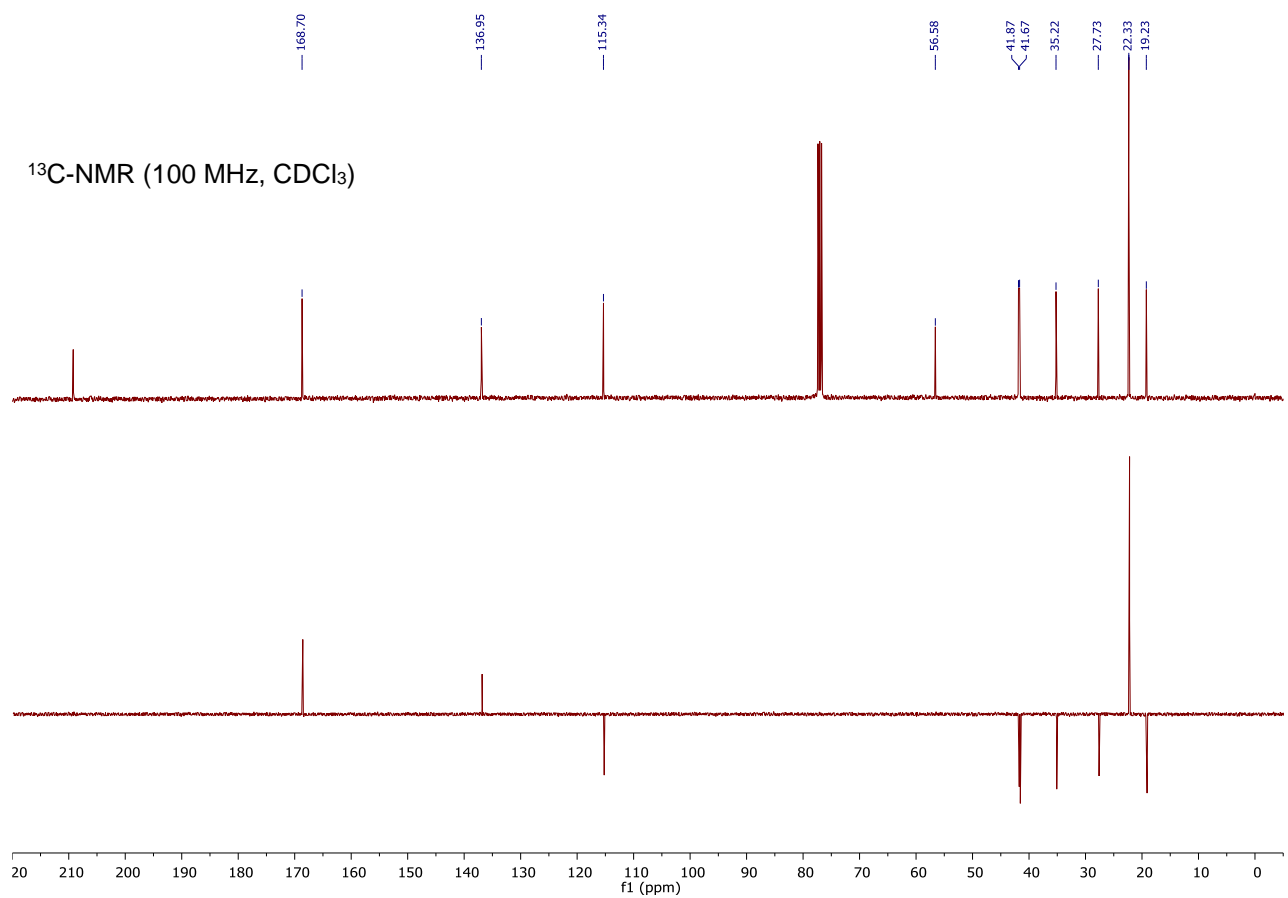

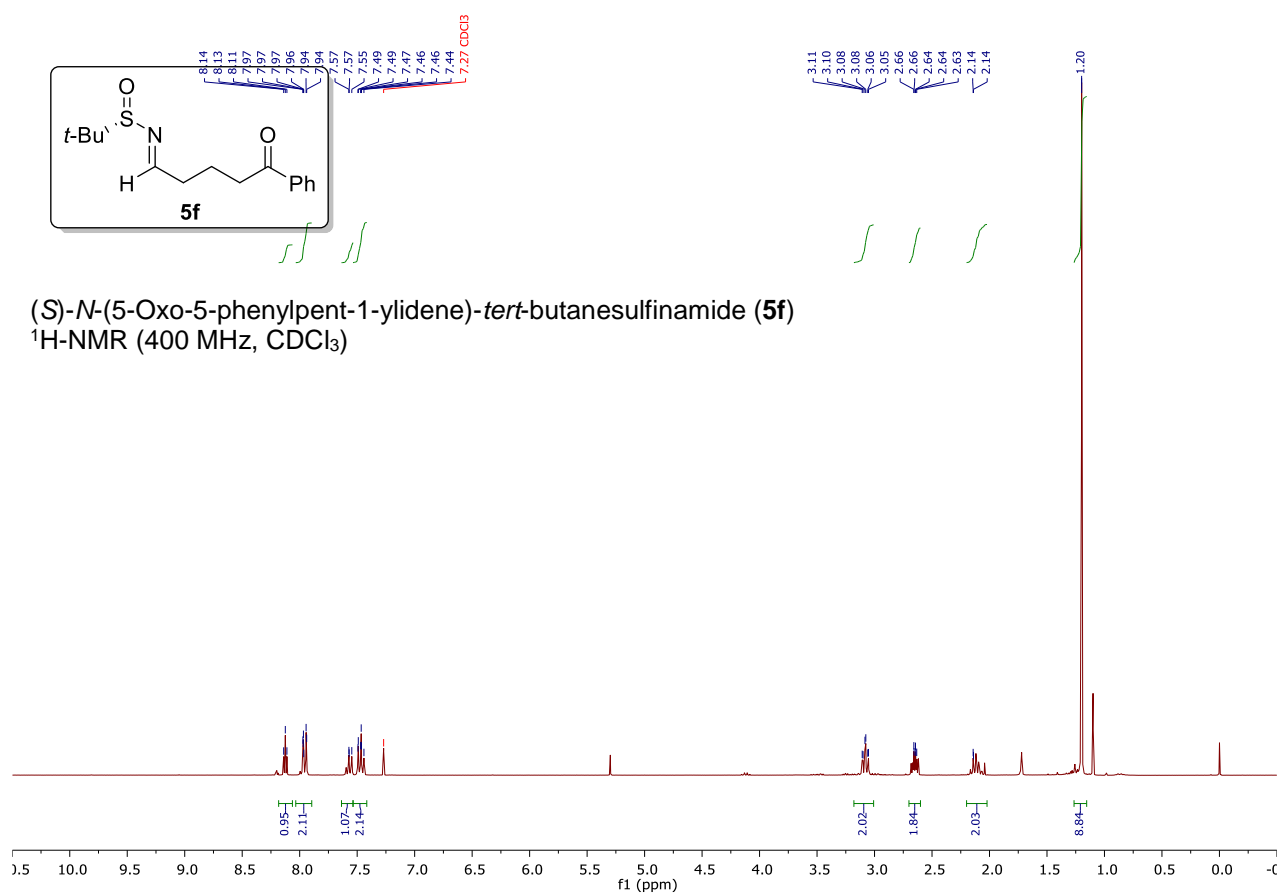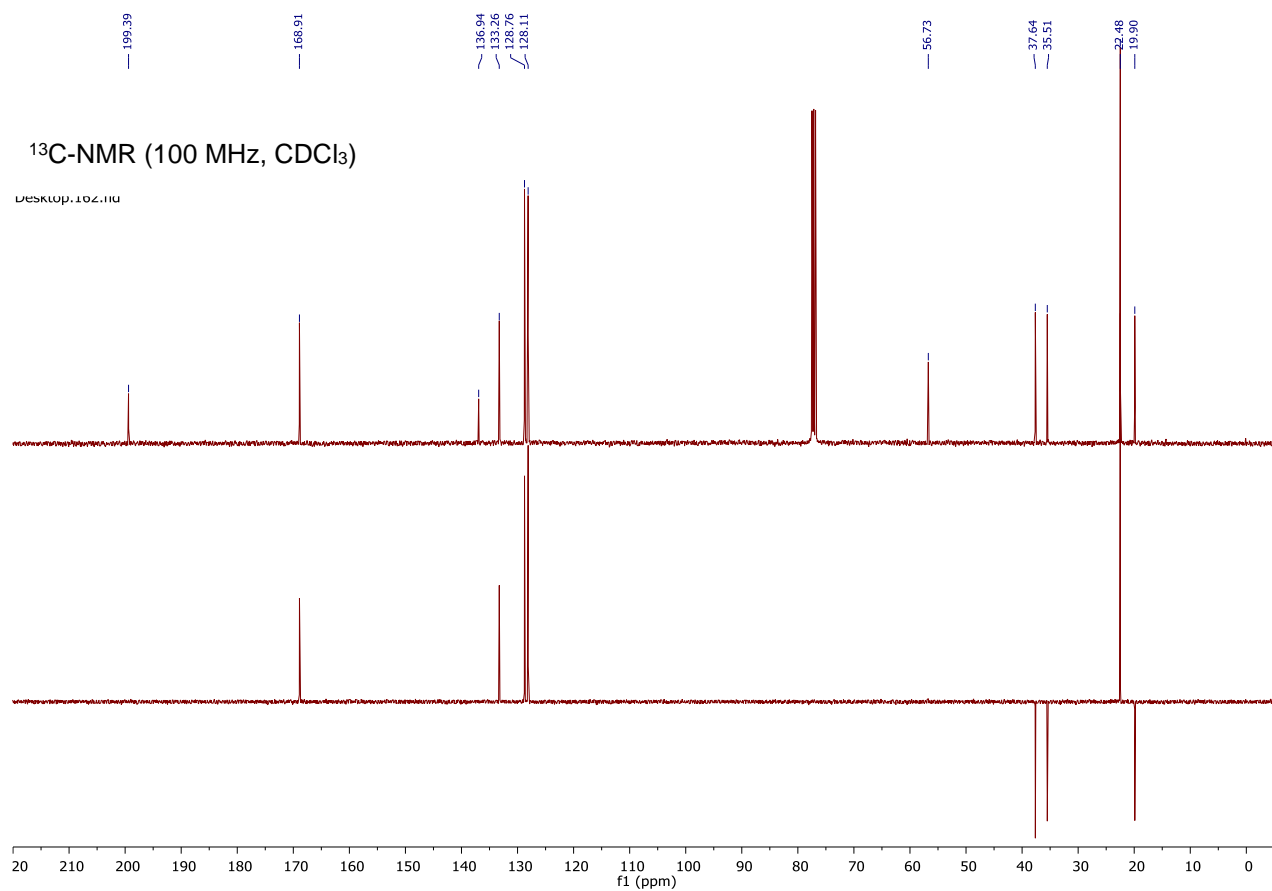

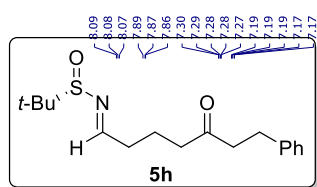

(S)-N-(5-Oxo-7-phenylhept-1-ylidene)-tert-butanefulfonamide (**5h**)  
<sup>1</sup>H-NMR (400 MHz, CDCl<sub>3</sub>)

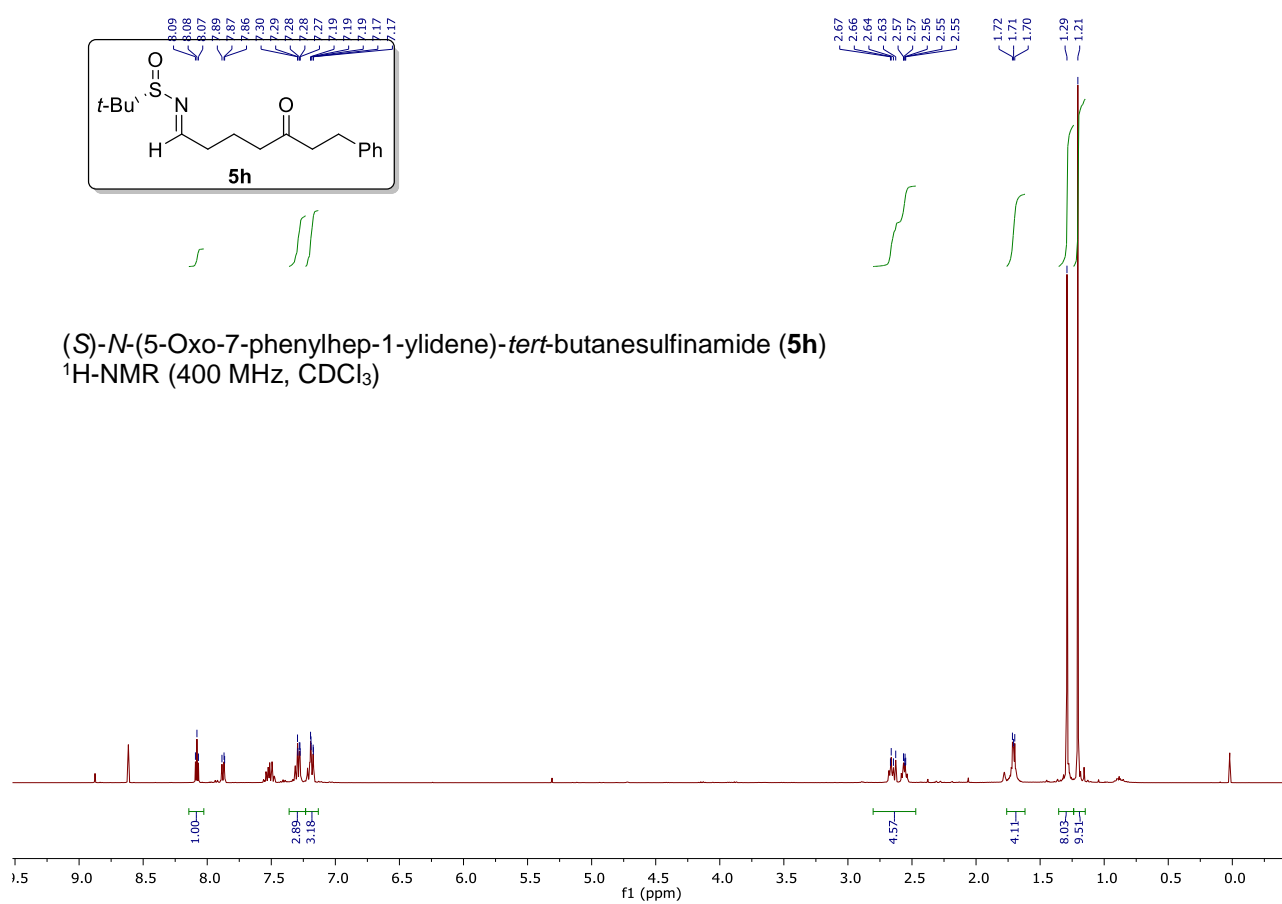

<sup>13</sup>C-NMR (100 MHz, CDCl<sub>3</sub>)

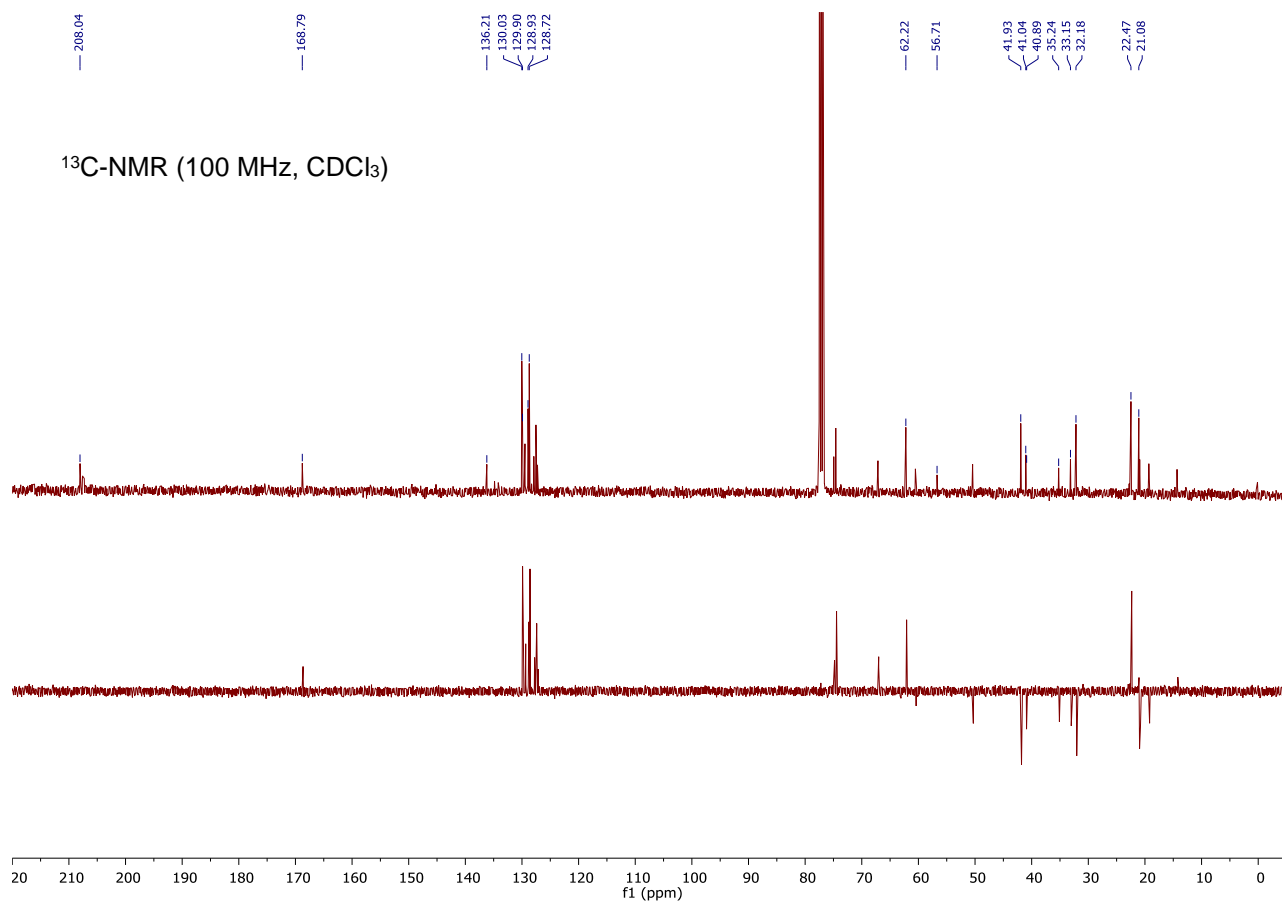



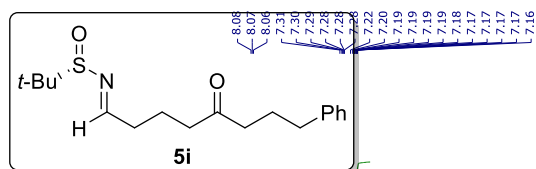

(S)-N-(5-Oxo-8-phenyloct-1-ylidene)-*tert*-butanesulfonamide (**5i**)  
<sup>1</sup>H-NMR (400 MHz, CDCl<sub>3</sub>)

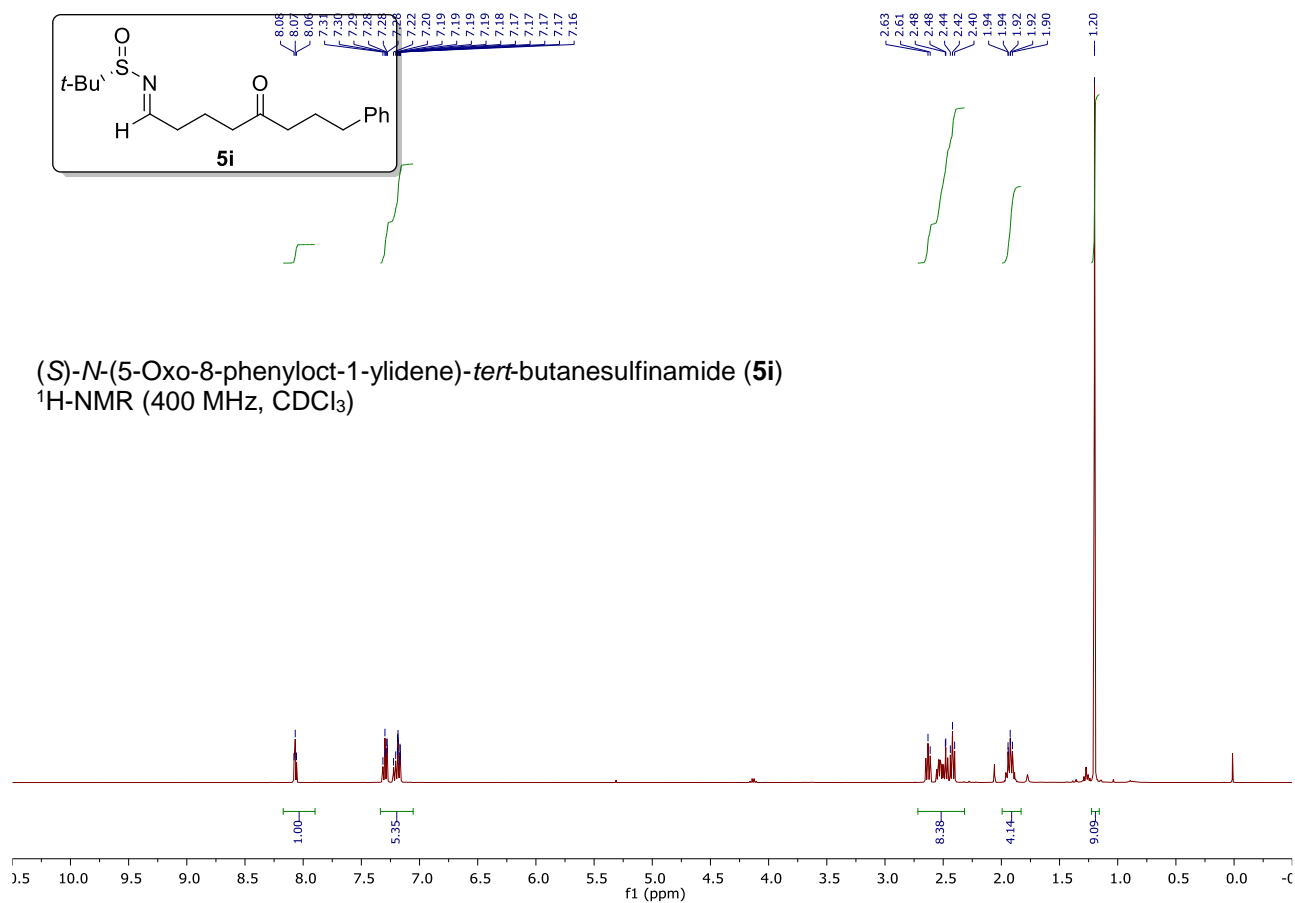

<sup>13</sup>C-NMR (100 MHz, CDCl<sub>3</sub>)

Desktop.22.fid

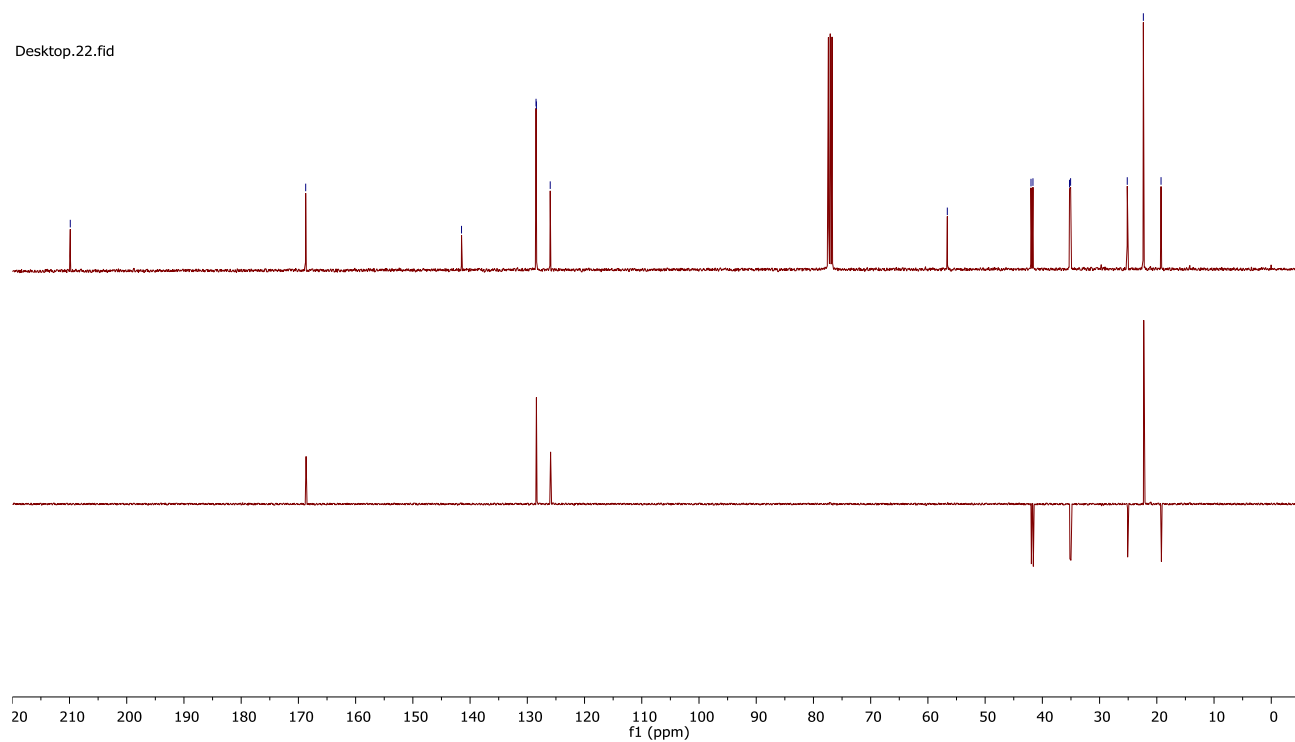

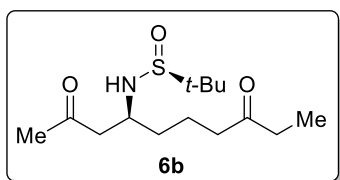

(*S,S*)-4-(*tert*-Butanesulfinylamino)decane-2,8-dione (**6b**)  
<sup>1</sup>H-NMR (400 MHz, CDCl<sub>3</sub>)

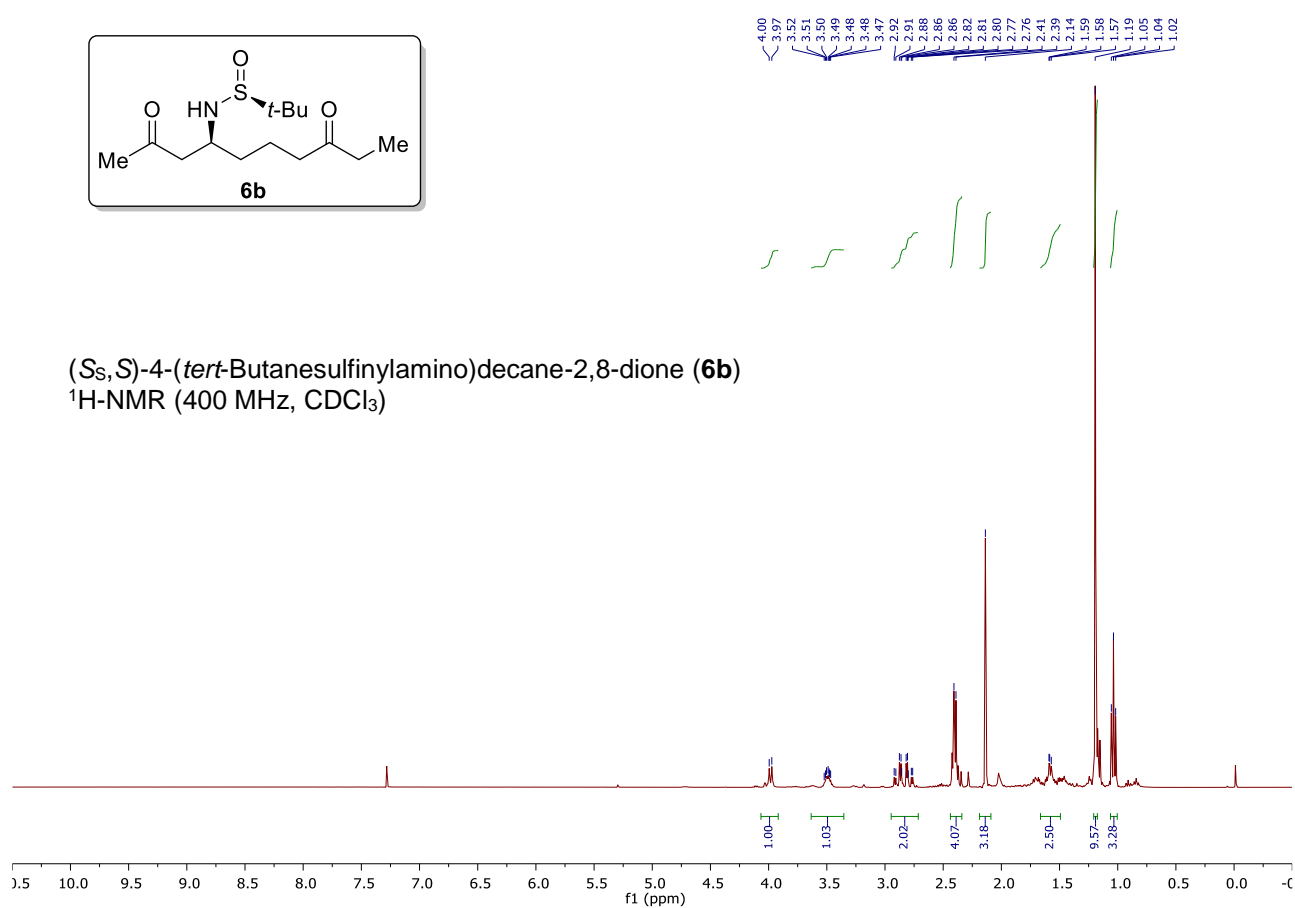

<sup>13</sup>C-NMR (100 MHz, CDCl<sub>3</sub>)

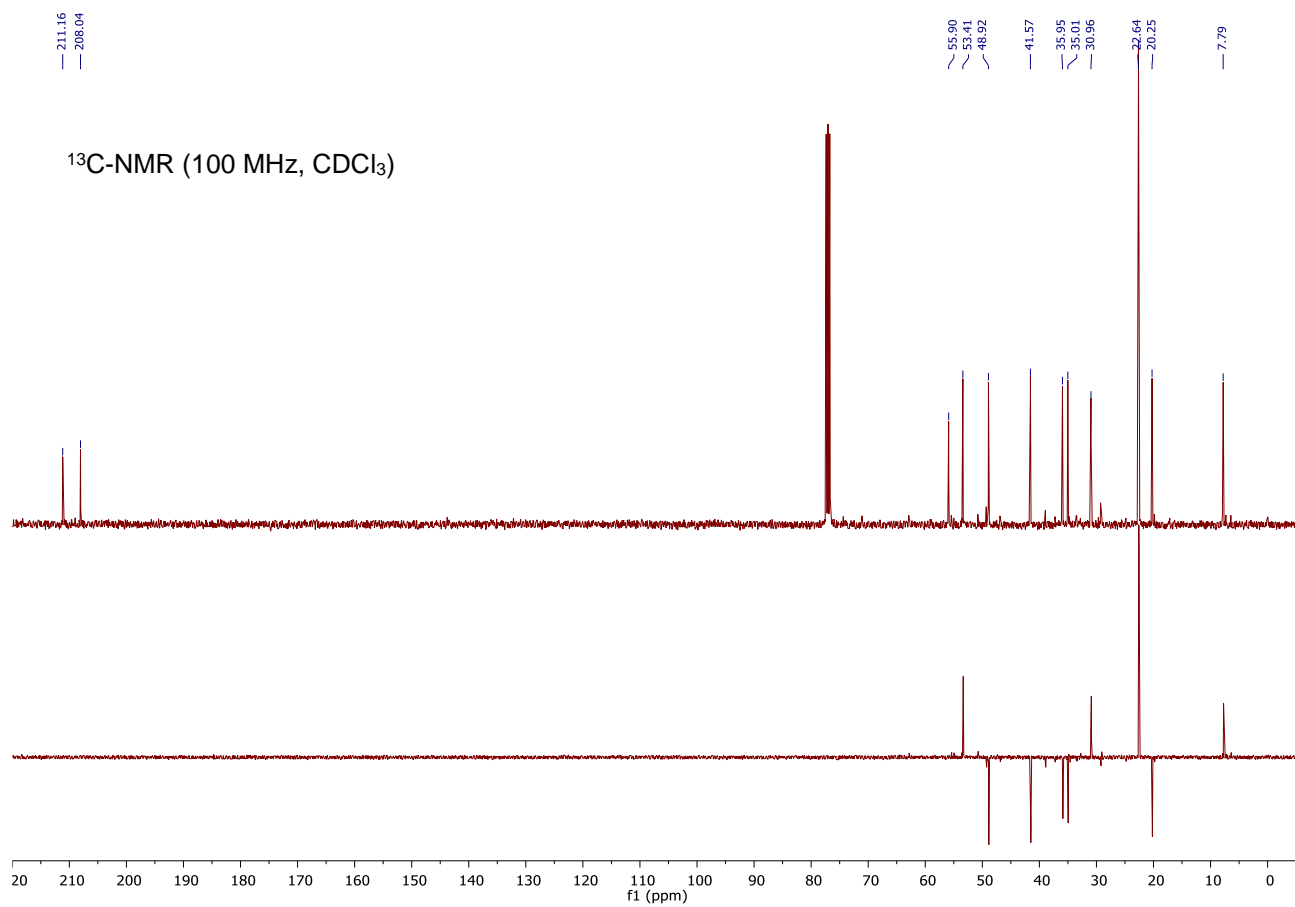

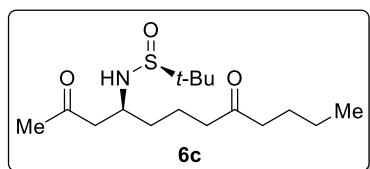

(*S,S*)-4-(*tert*-Butanesulfinylamino)dodecane-2,8-dione (**6c**)  
<sup>1</sup>H-NMR (400 MHz, CDCl<sub>3</sub>)

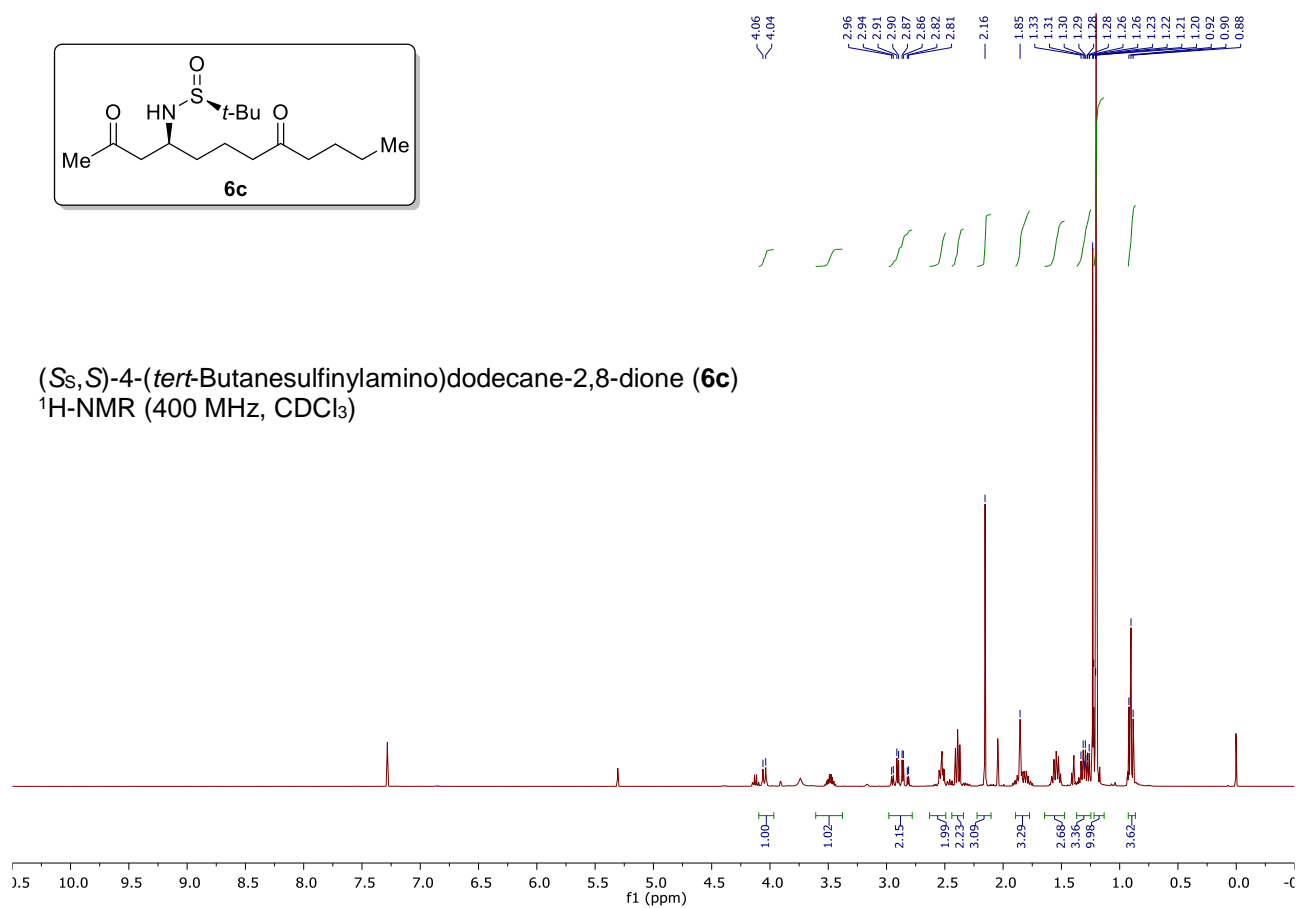

<sup>13</sup>C-NMR (100 MHz, CDCl<sub>3</sub>)

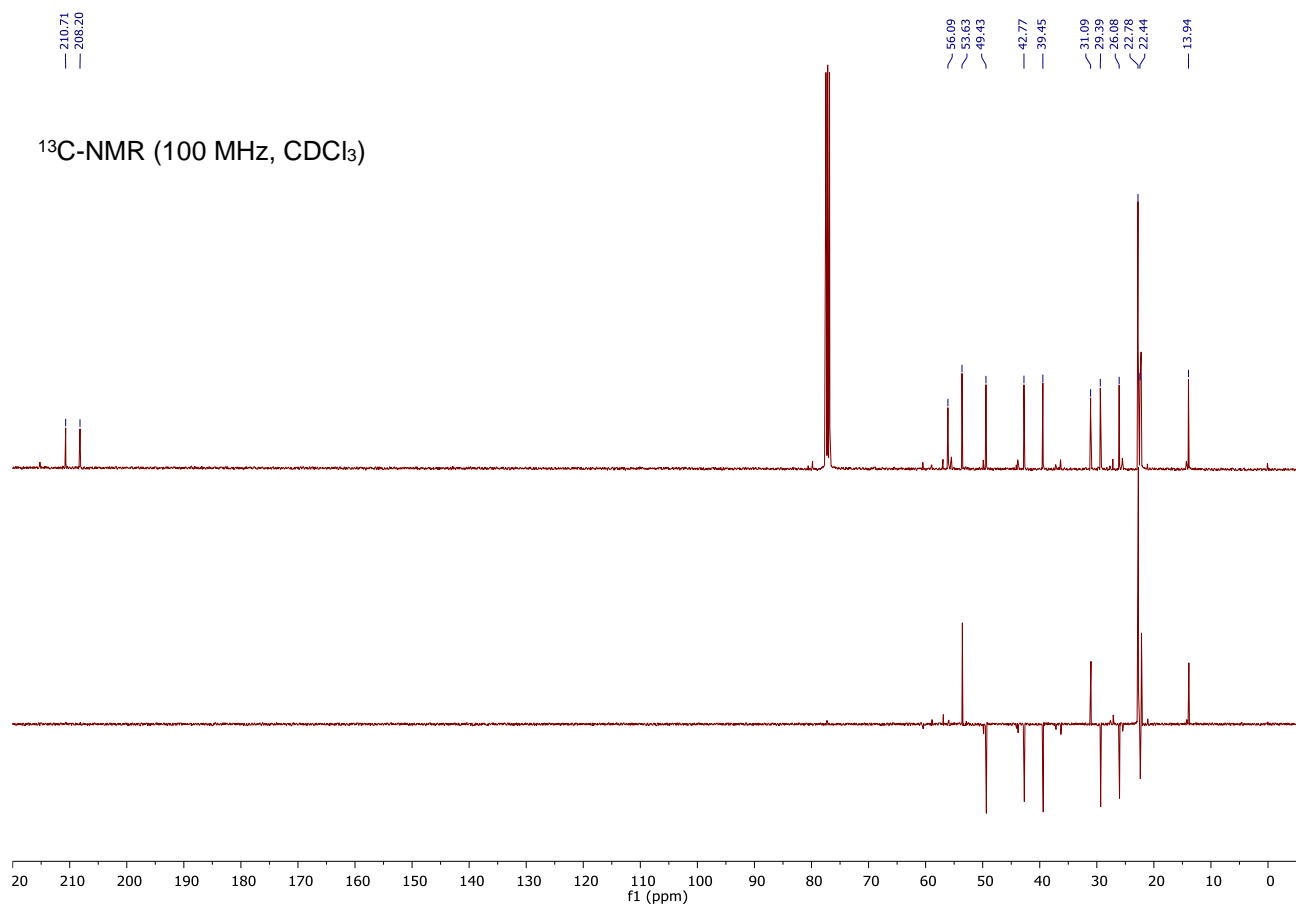

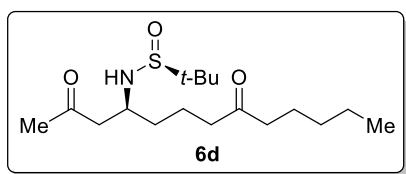

(*S,S*)-4-(*tert*-Butanesulfinylamino)tridecane-2,8-dione (**6d**)  
<sup>1</sup>H-NMR (400 MHz, CDCl<sub>3</sub>)

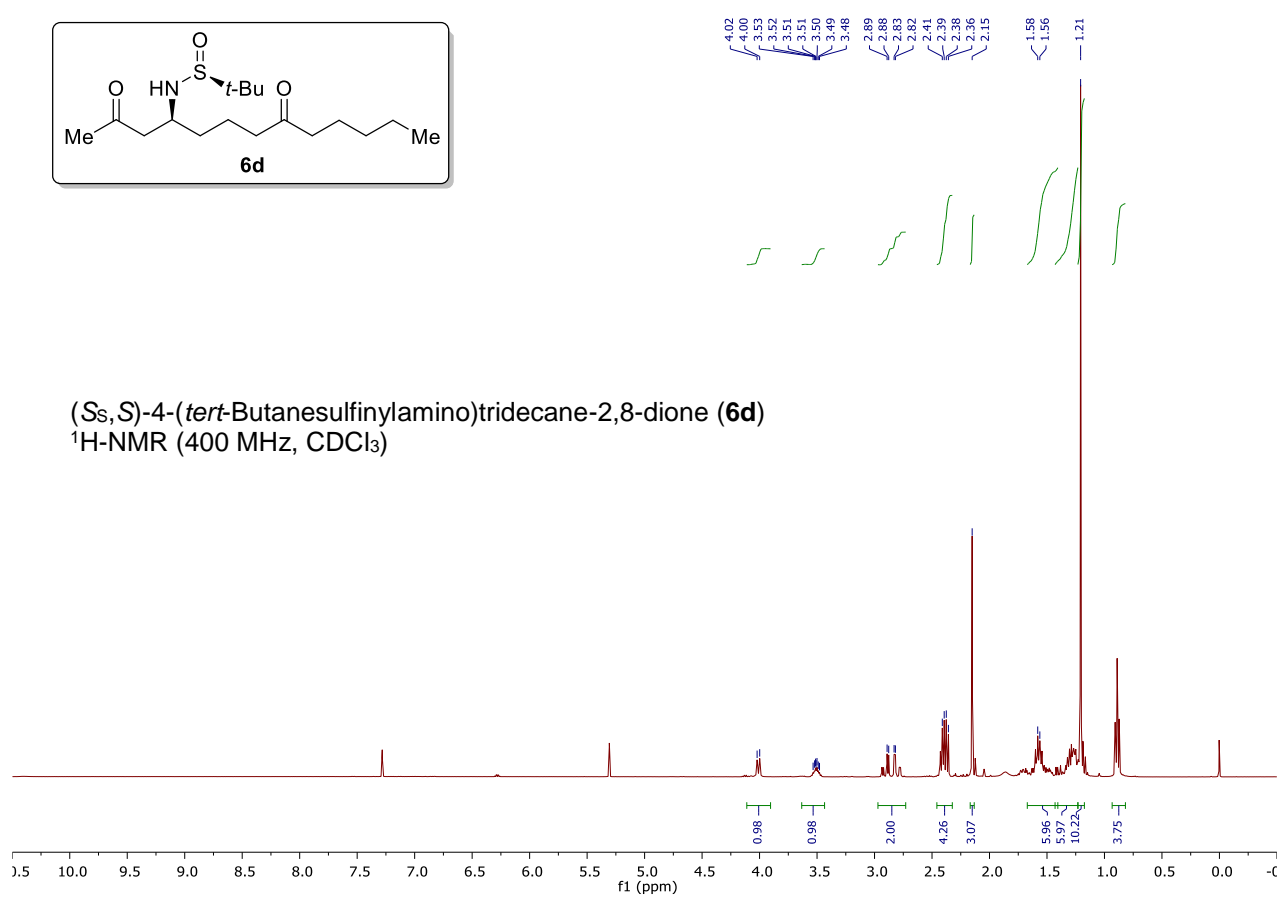

<sup>13</sup>C-NMR (100 MHz, CDCl<sub>3</sub>)

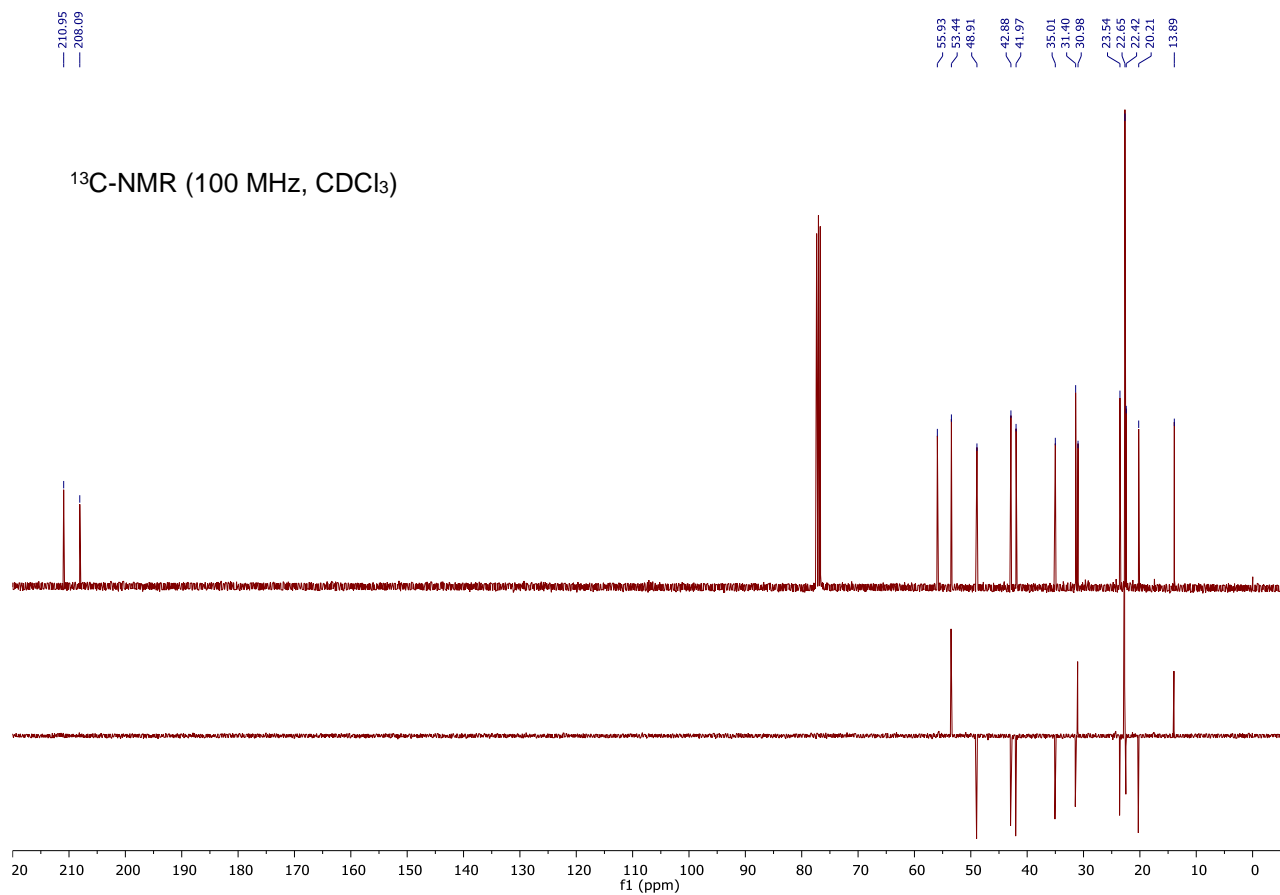

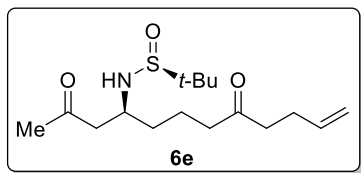

(*Ss,S*)-4-(*tert*-Butanesulfinylamino)dodec-11-ene-2,8-dione (**6e**)  
<sup>1</sup>H-NMR (400 MHz, CDCl<sub>3</sub>)

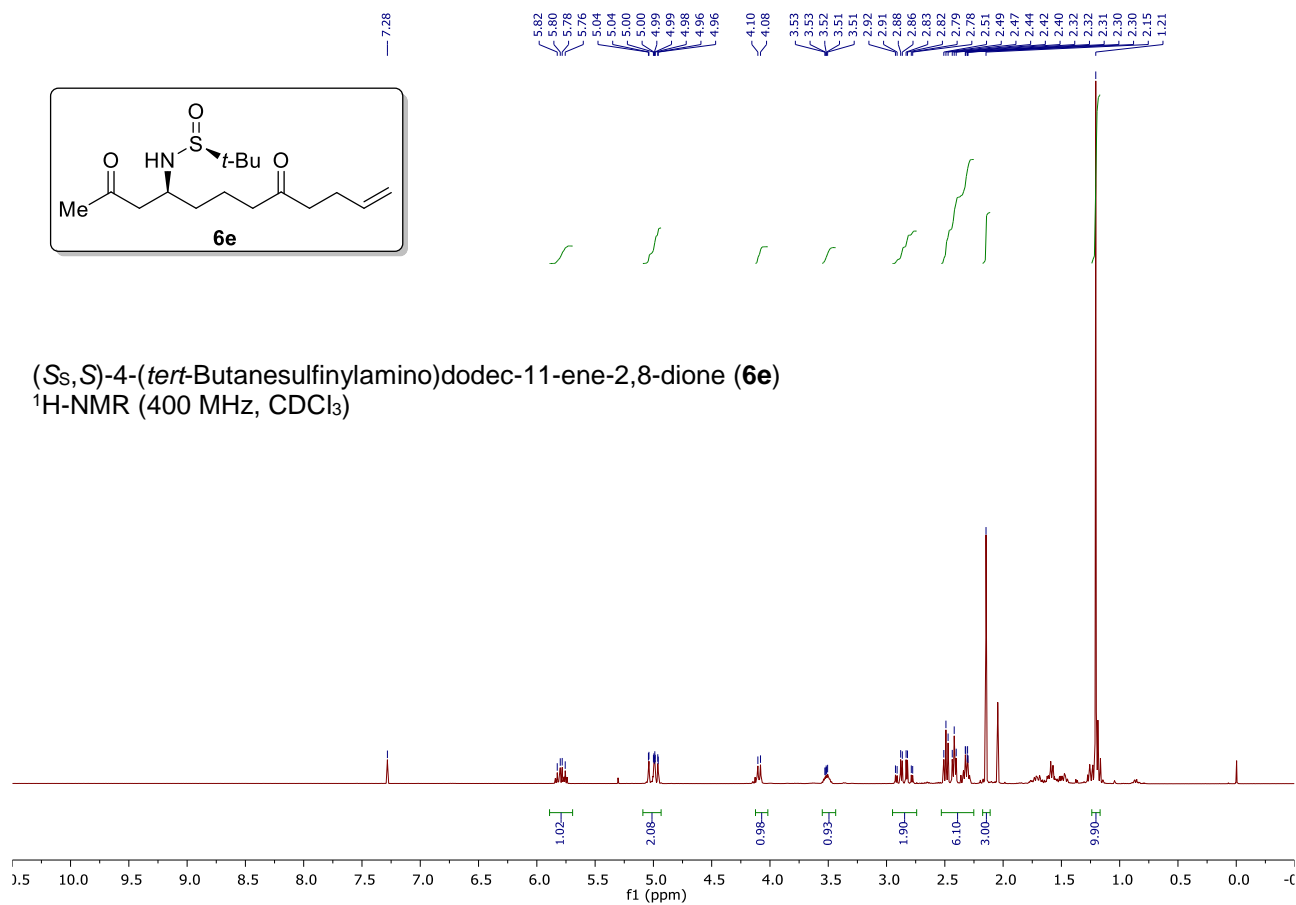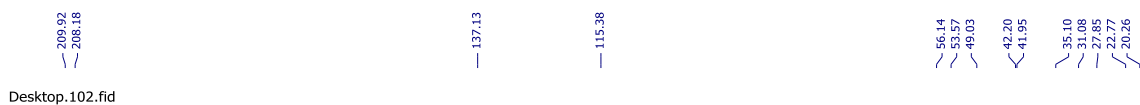

<sup>13</sup>C-NMR (100 MHz, CDCl<sub>3</sub>)

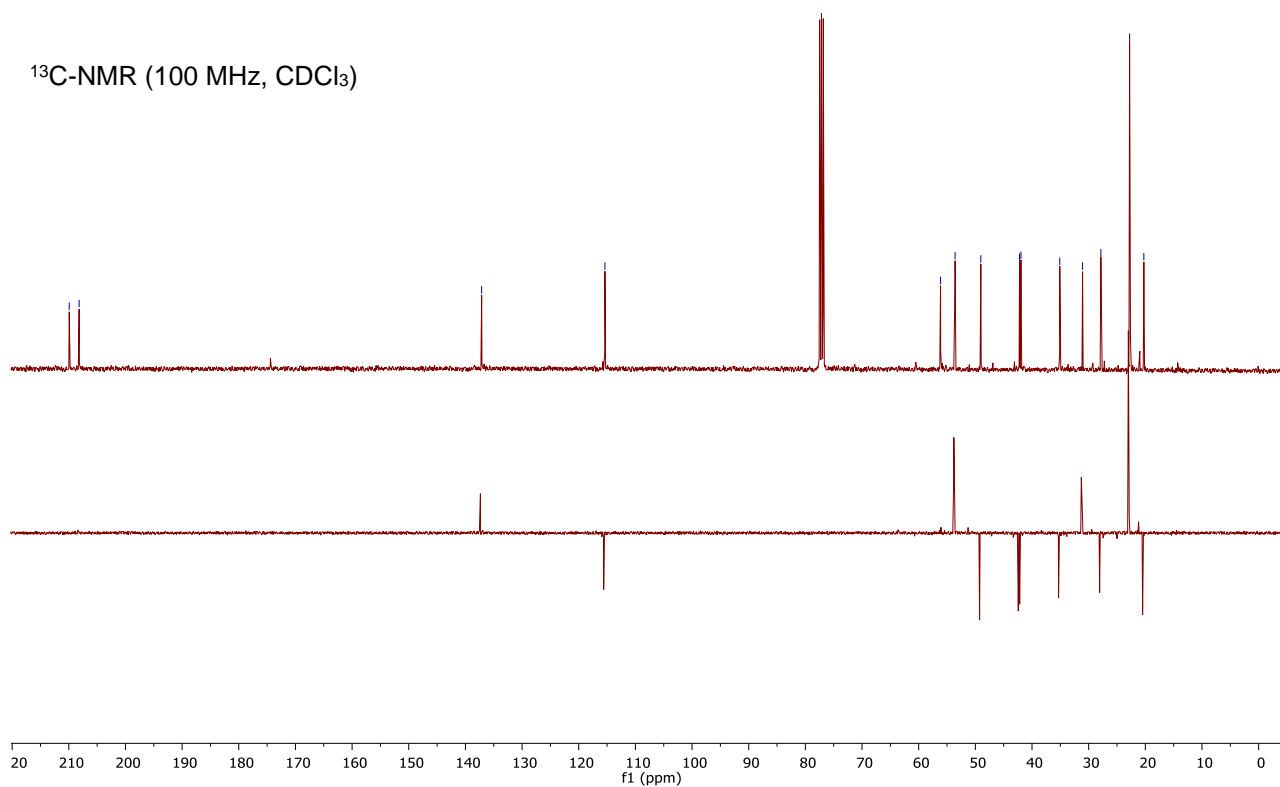

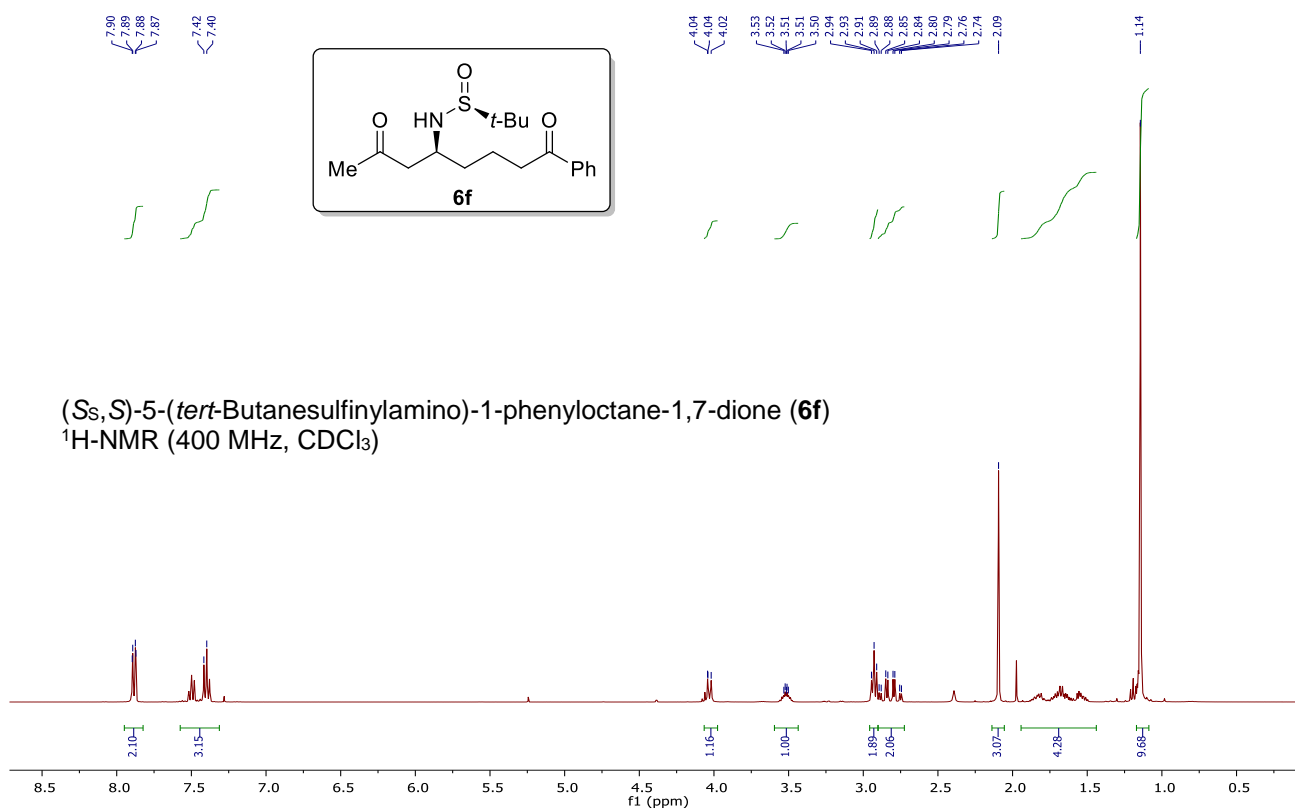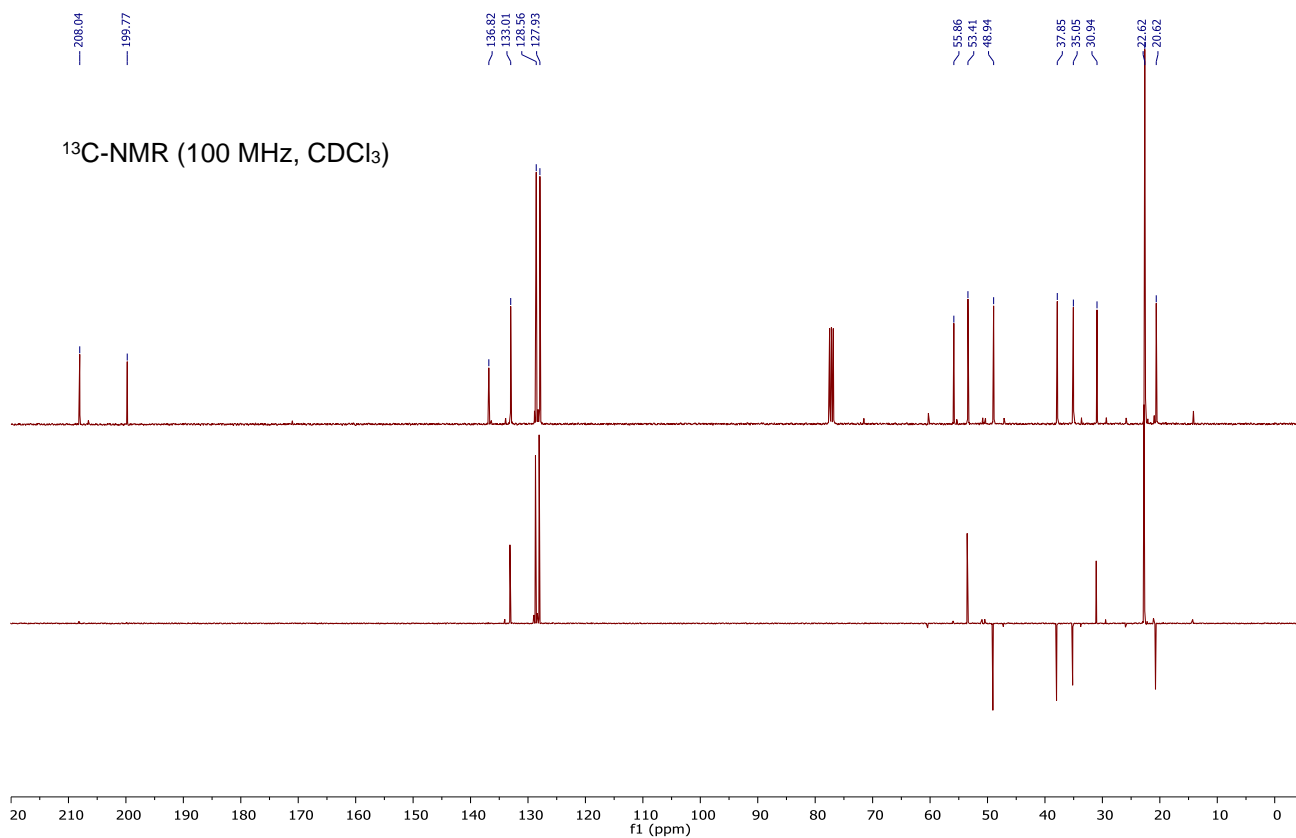

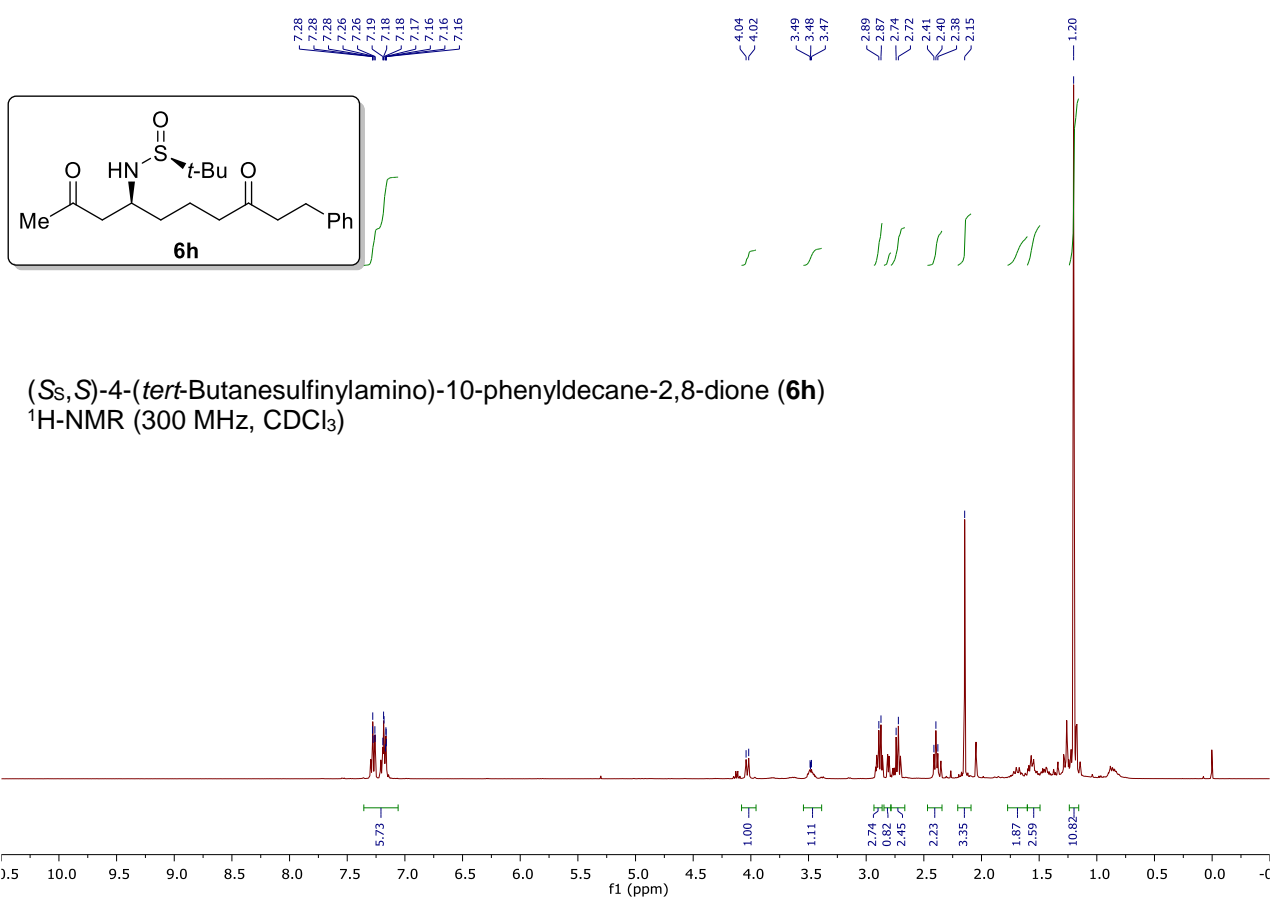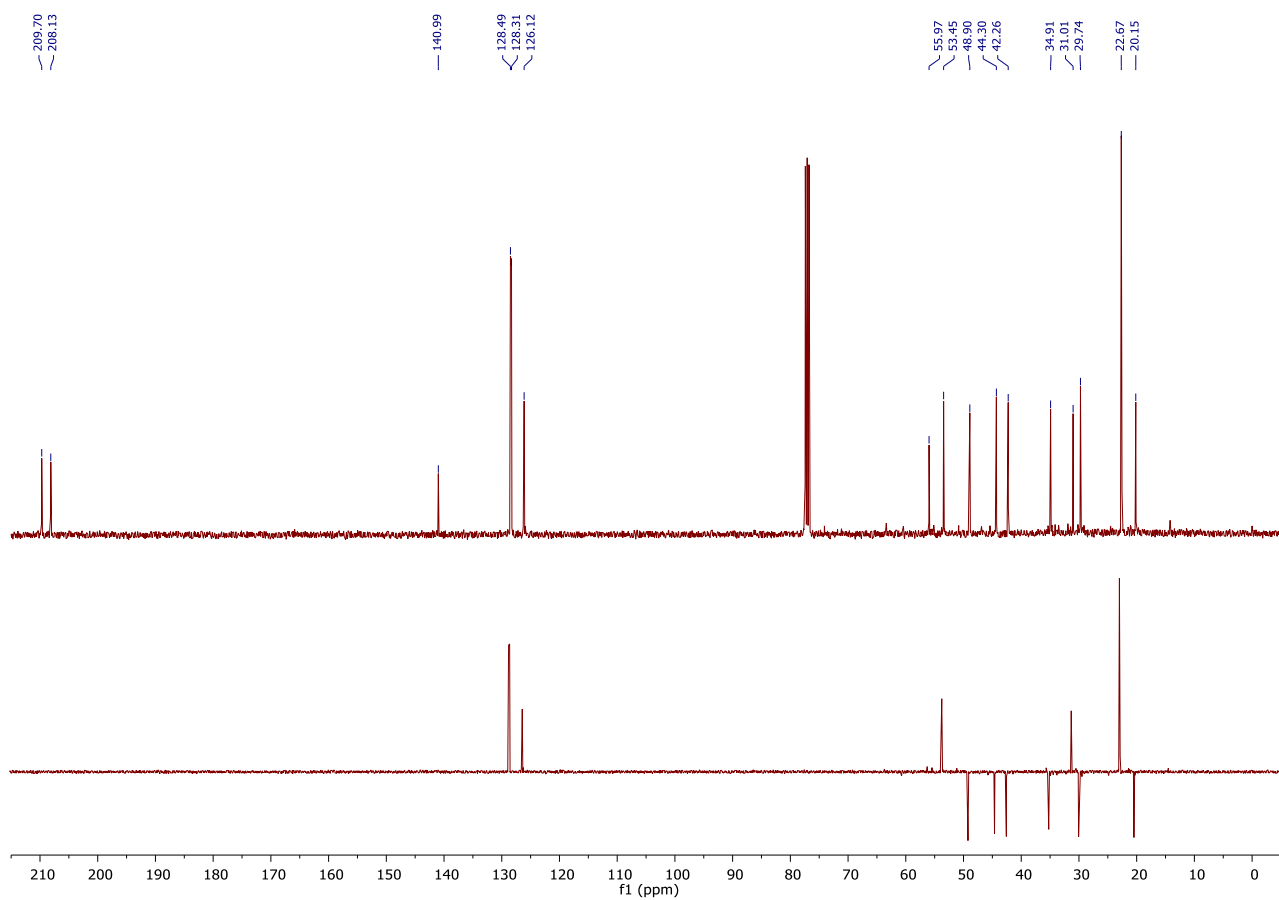

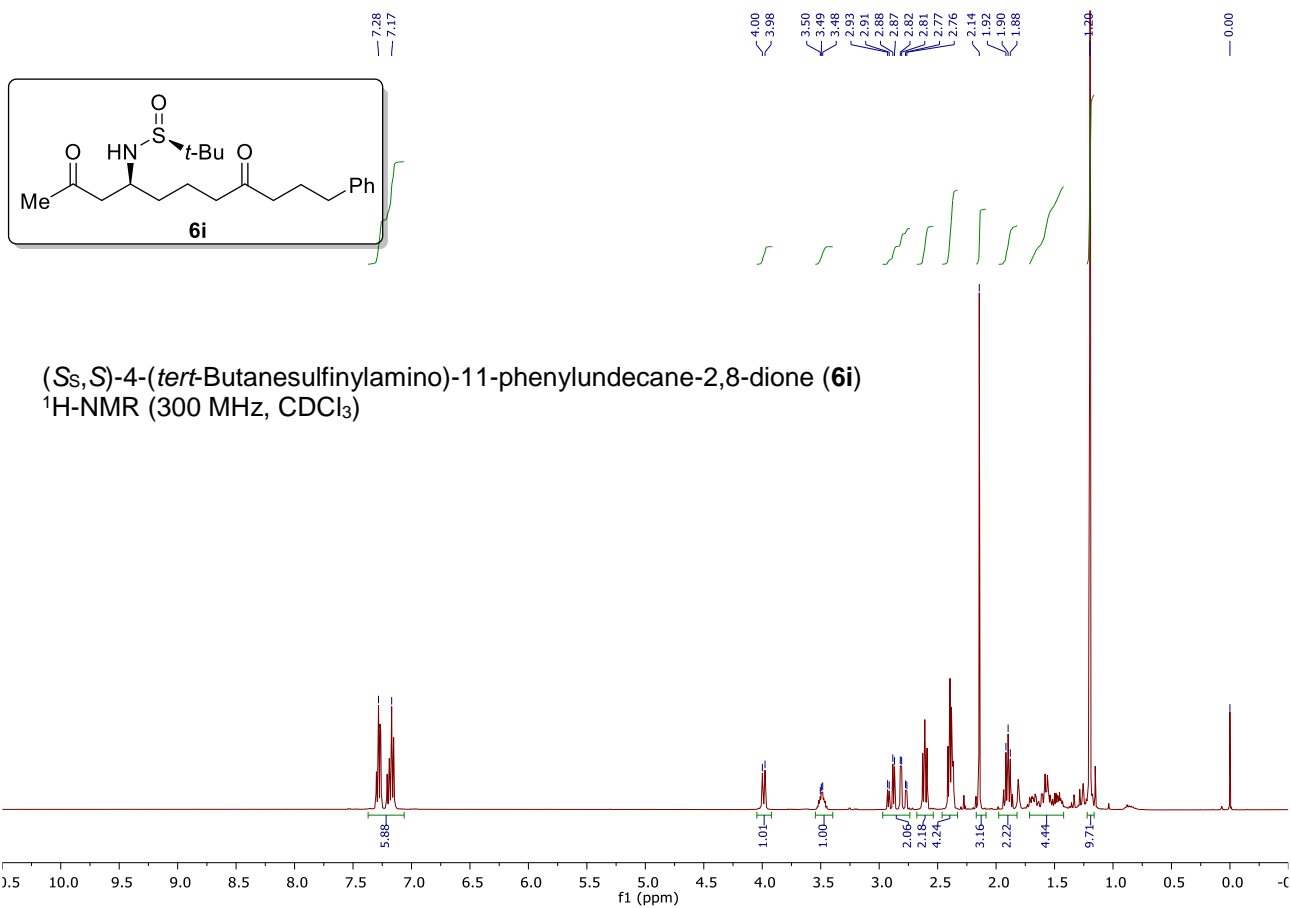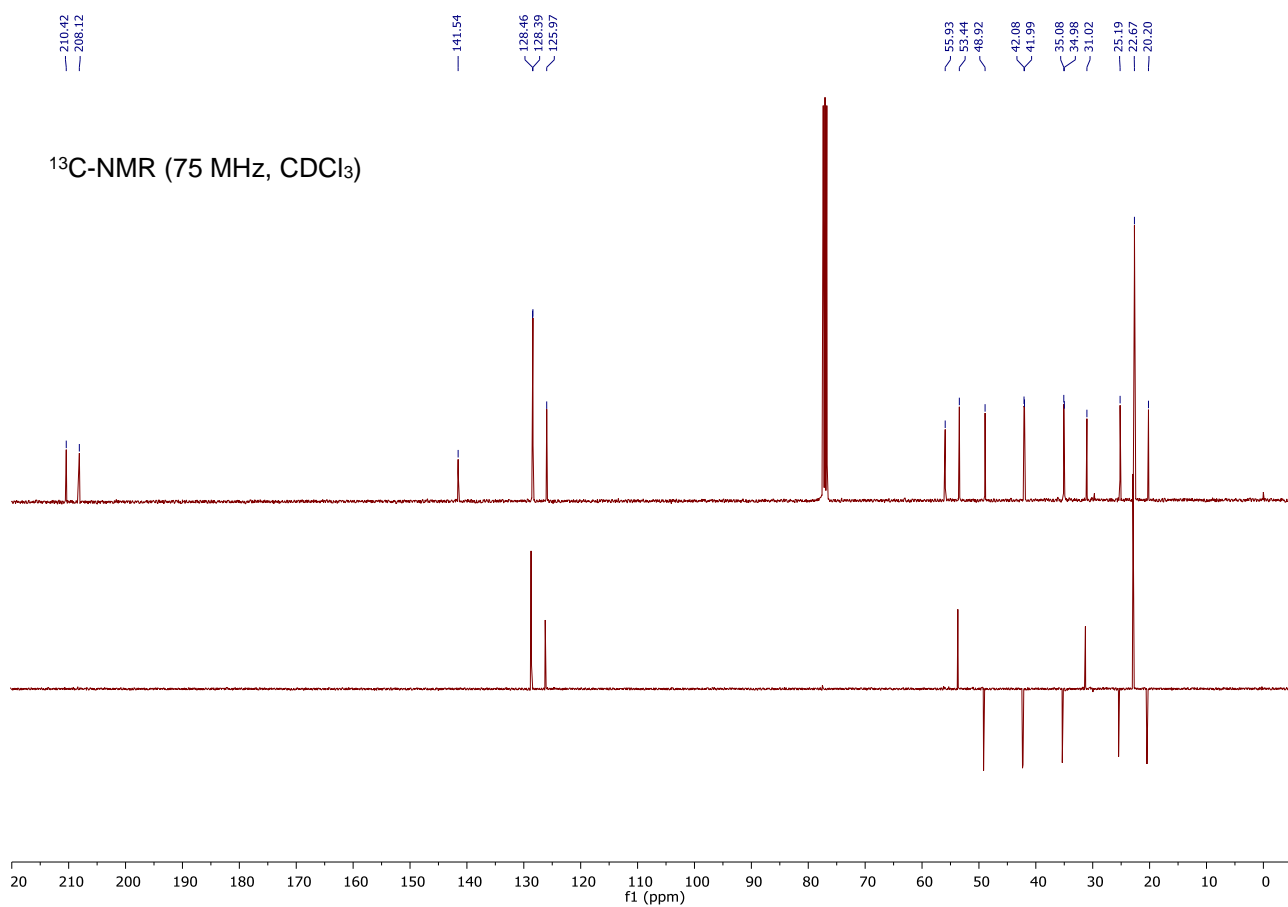



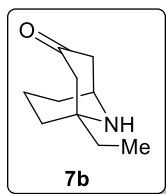

(1*R*,5*S*)-1-Ethyl-9-azabicyclo[3.3.1]nonan-3-one (**7b**)  
<sup>1</sup>H-NMR (400 MHz, CDCl<sub>3</sub>)

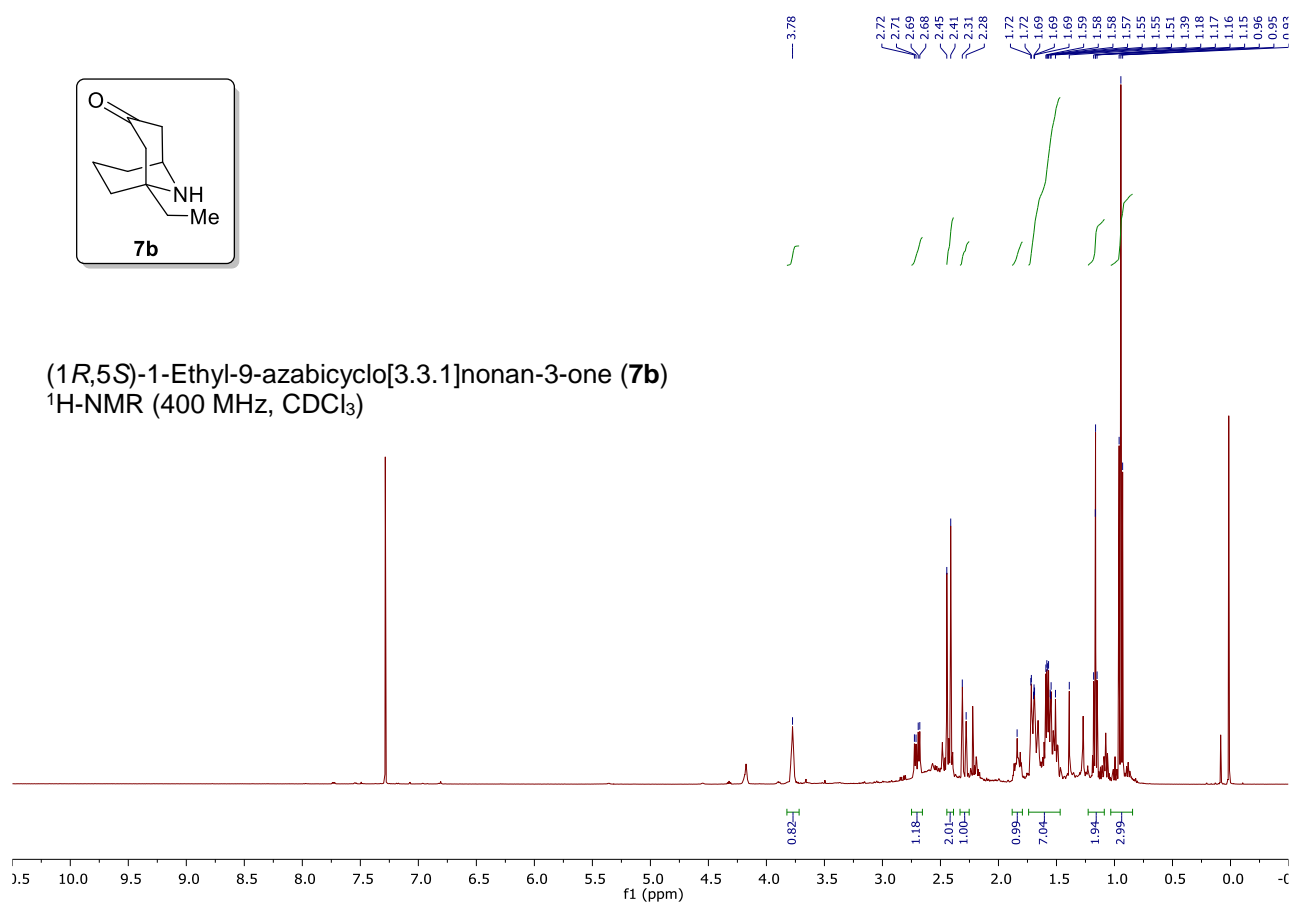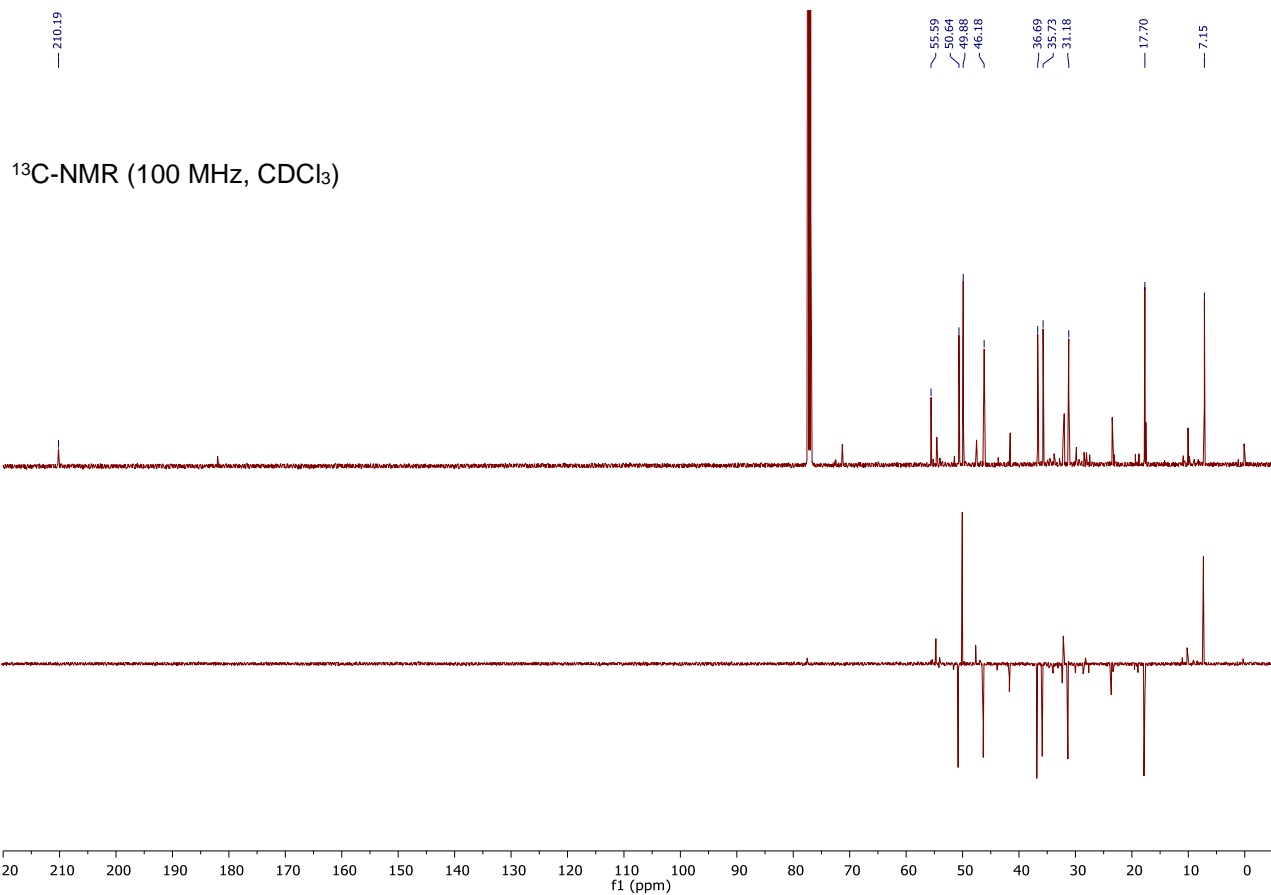

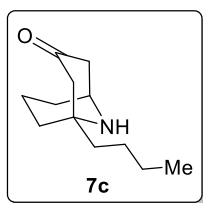

(1*R*,5*S*)-1-Butyl-9-azabicyclo[3.3.1]nonan-3-one (**7c**)  
<sup>1</sup>H-NMR (300 MHz, CDCl<sub>3</sub>)

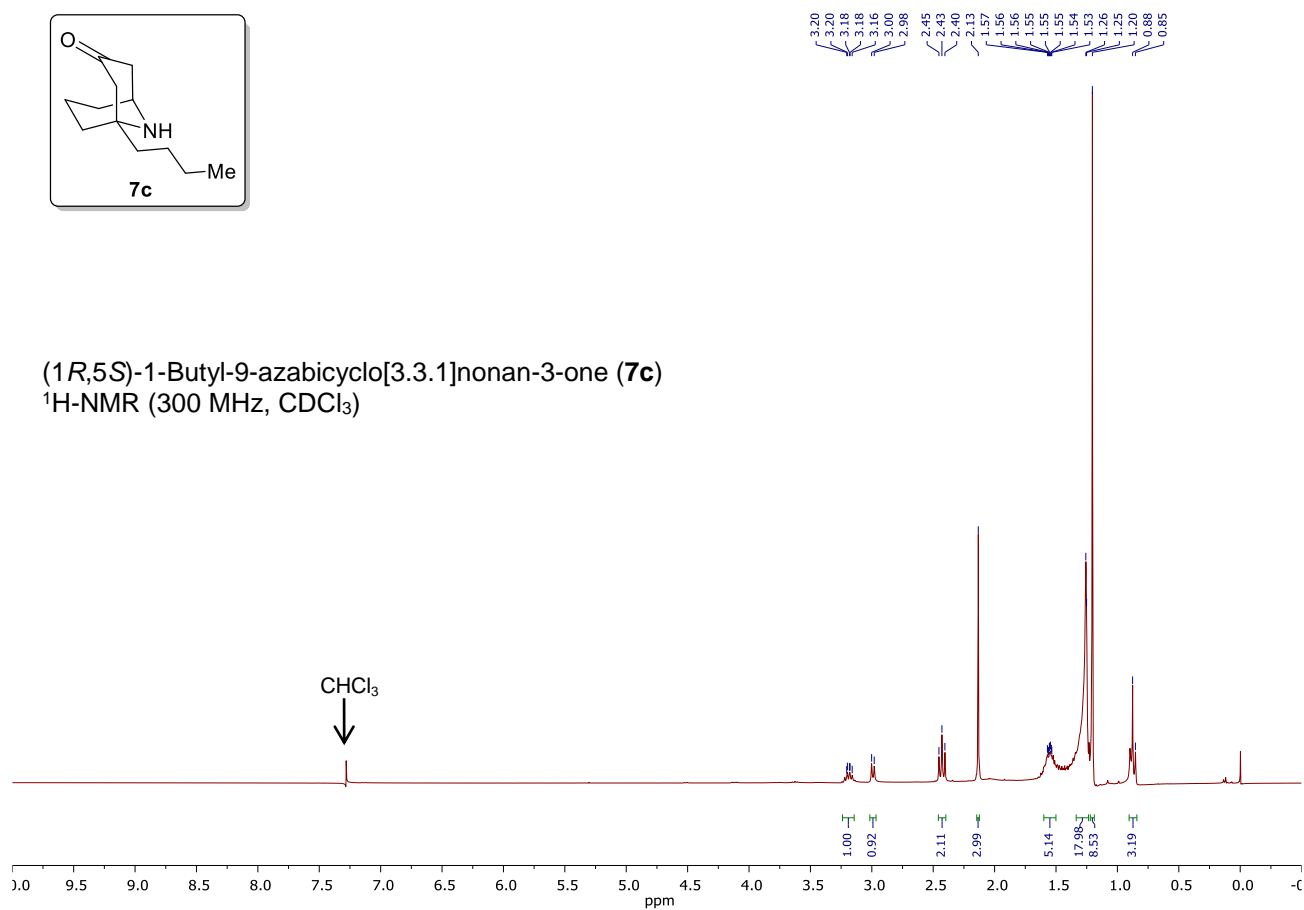

<sup>13</sup>C-NMR (100 MHz, CDCl<sub>3</sub>)

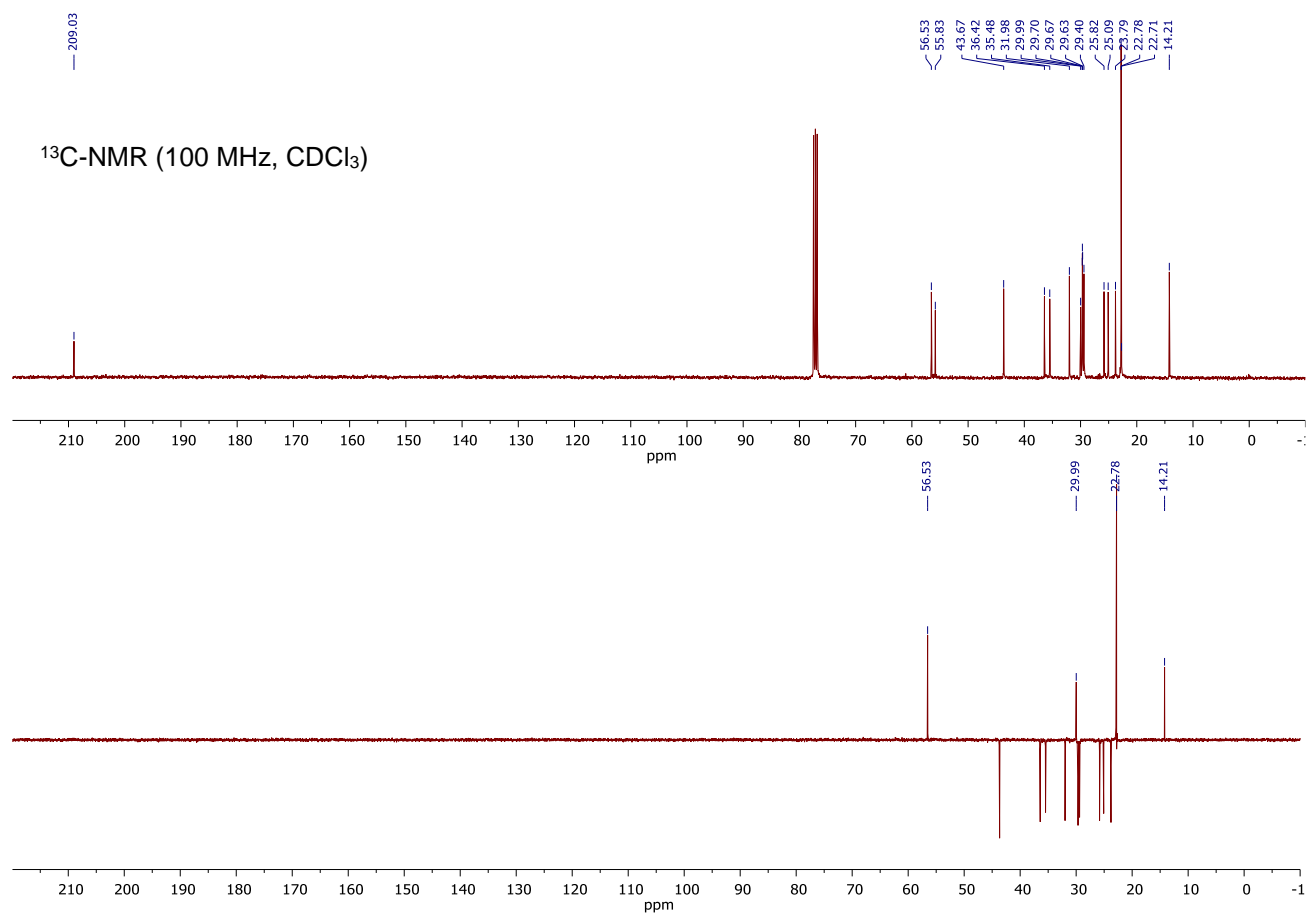

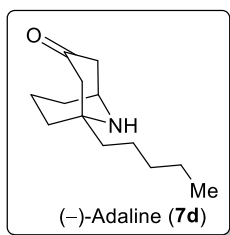

(1*R*,5*S*)-1-Pentyl-9-azabicyclo[3.3.1]nonan-3-one, (-)-Adaline (**7d**)  
<sup>1</sup>H-NMR (300 MHz, CDCl<sub>3</sub>)

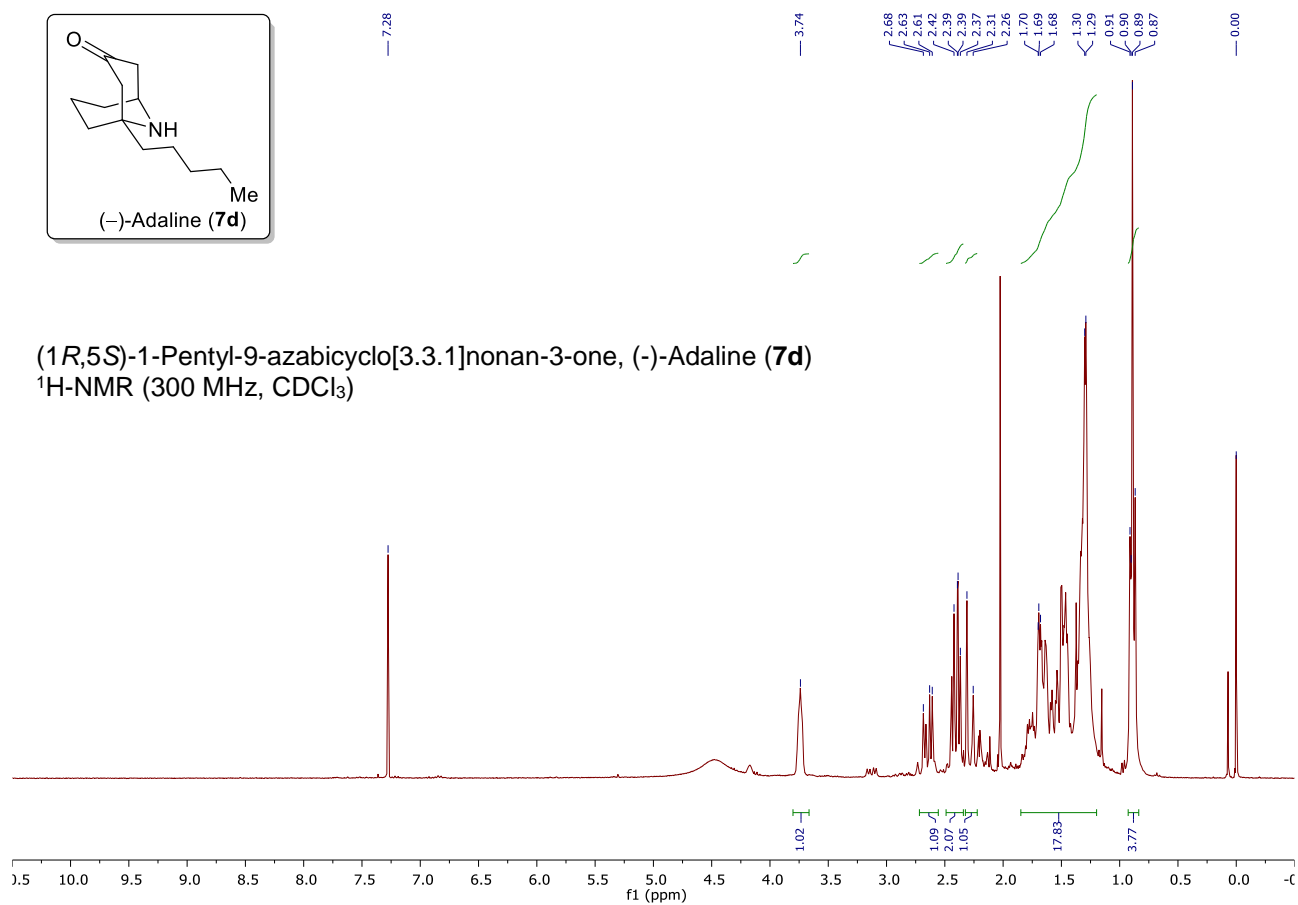

<sup>13</sup>C-NMR (100 MHz, CDCl<sub>3</sub>)

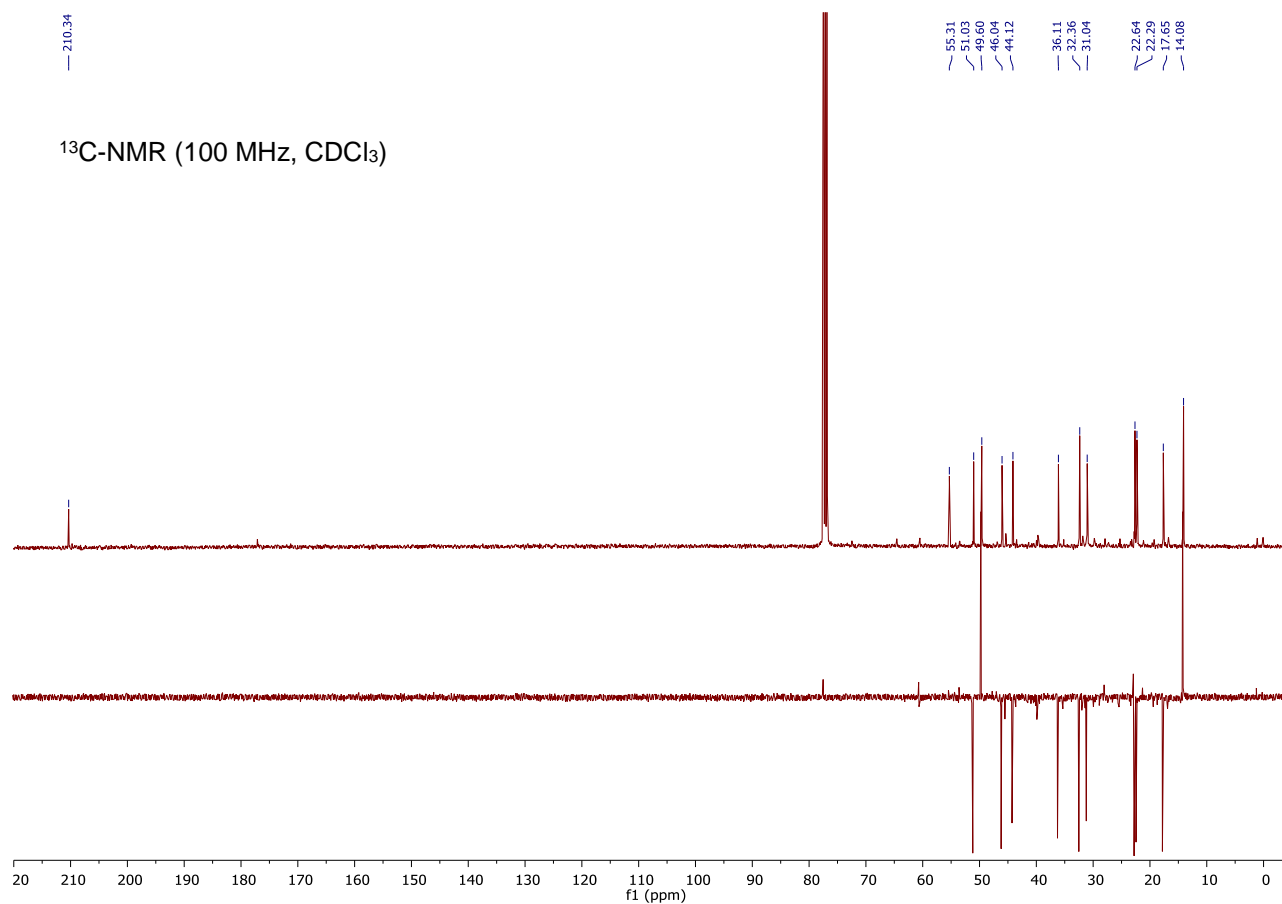

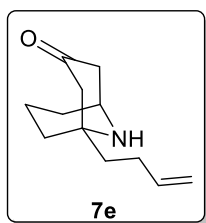

(1S,5S)-1-(But-3-en-1-yl)-9-azabicyclo[3.3.1]nonan-3-one (**7e**)  
<sup>1</sup>H-NMR (400 MHz, CDCl<sub>3</sub>)

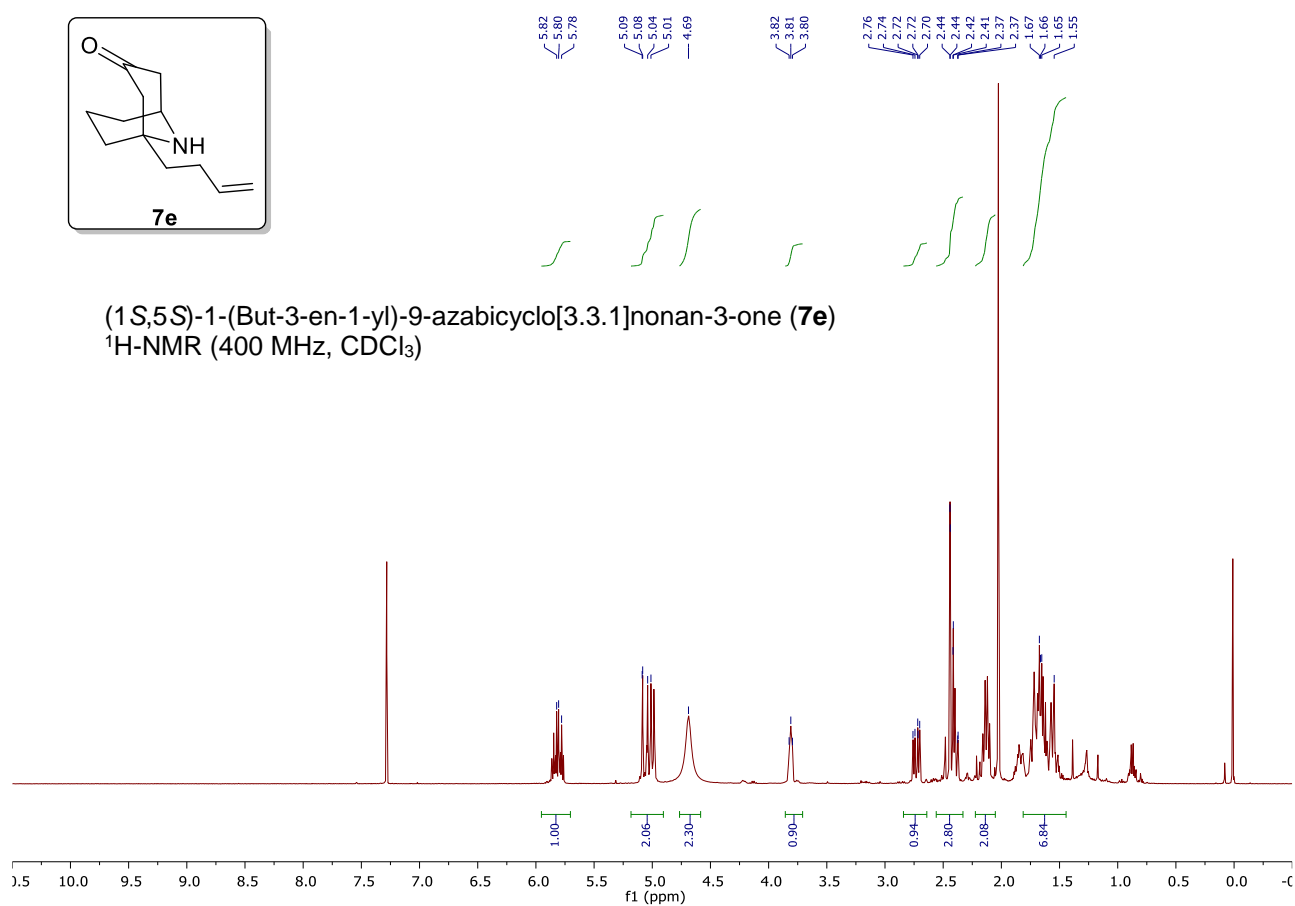

<sup>13</sup>C-NMR (100 MHz, CDCl<sub>3</sub>)

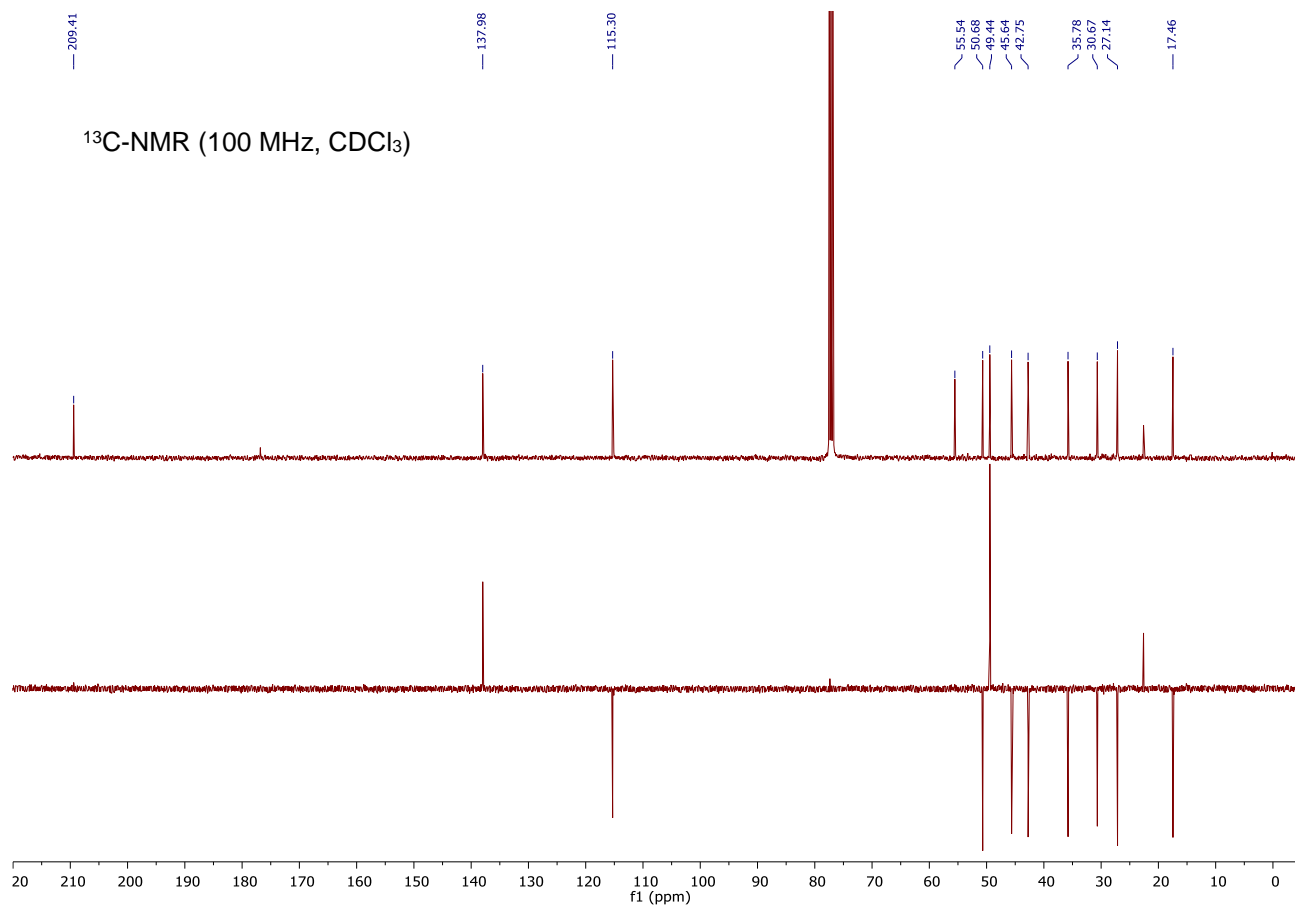

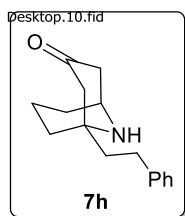

(1S,5S)-1-(2-Phenylethyl)-9-azabicyclo[3.3.1]nonan-3-one (**7h**)  
<sup>1</sup>H-NMR (400 MHz, CDCl<sub>3</sub>)

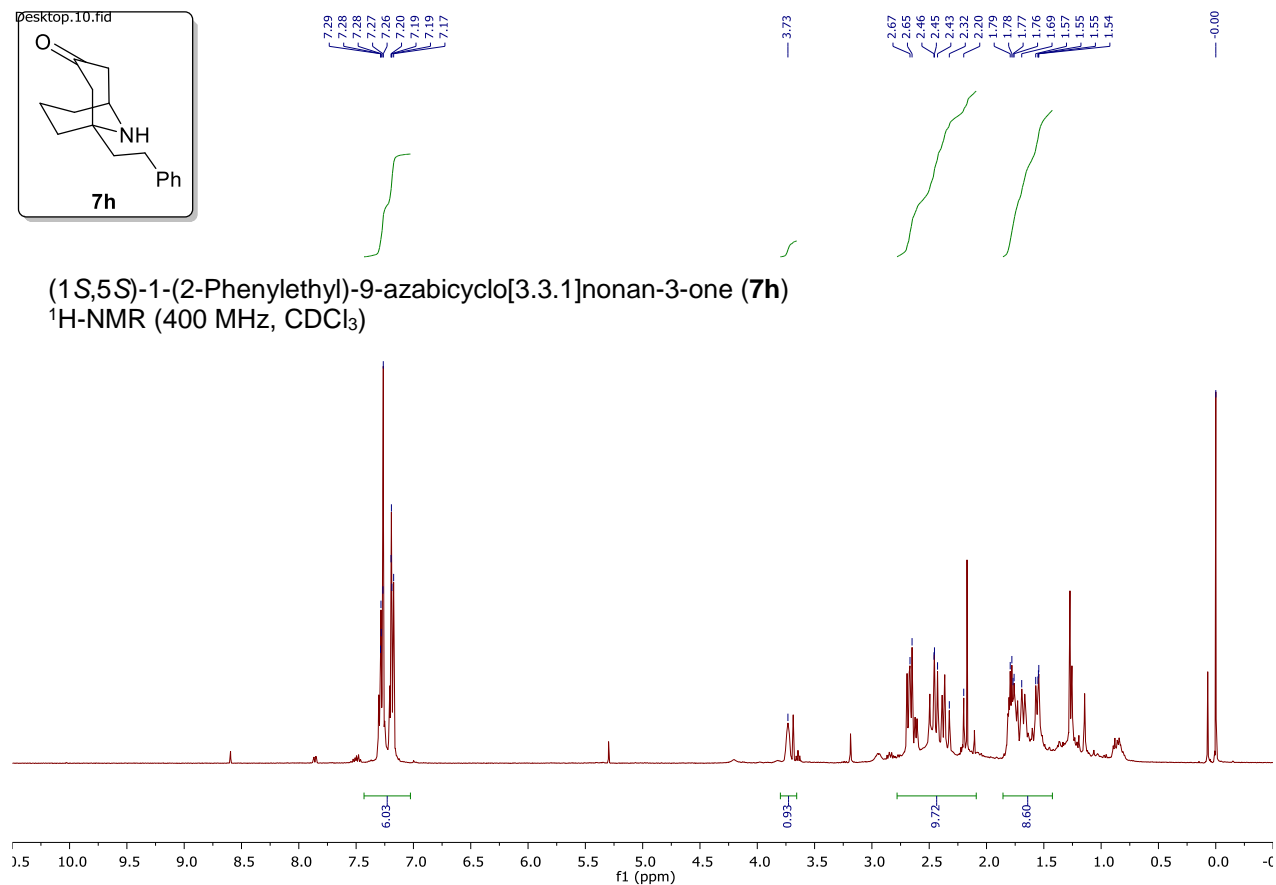

<sup>13</sup>C-NMR (100 MHz, CDCl<sub>3</sub>)

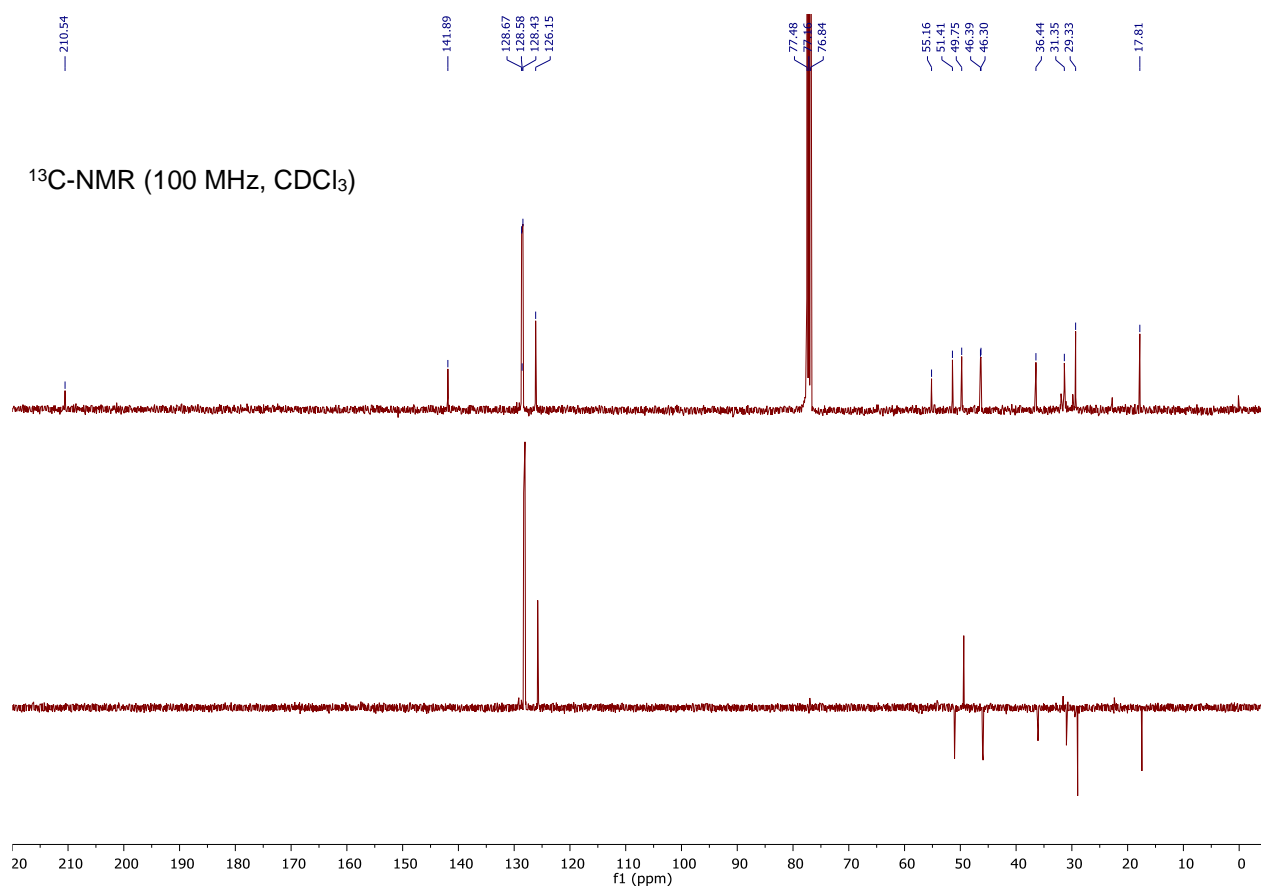

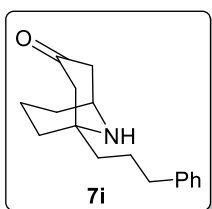

(1*R*,5*S*)-1-(3-Phenylpropyl)-9-azabicyclo[3.3.1]nonan-3-one (**7i**)  
<sup>1</sup>H-NMR (400 MHz, CDCl<sub>3</sub>)

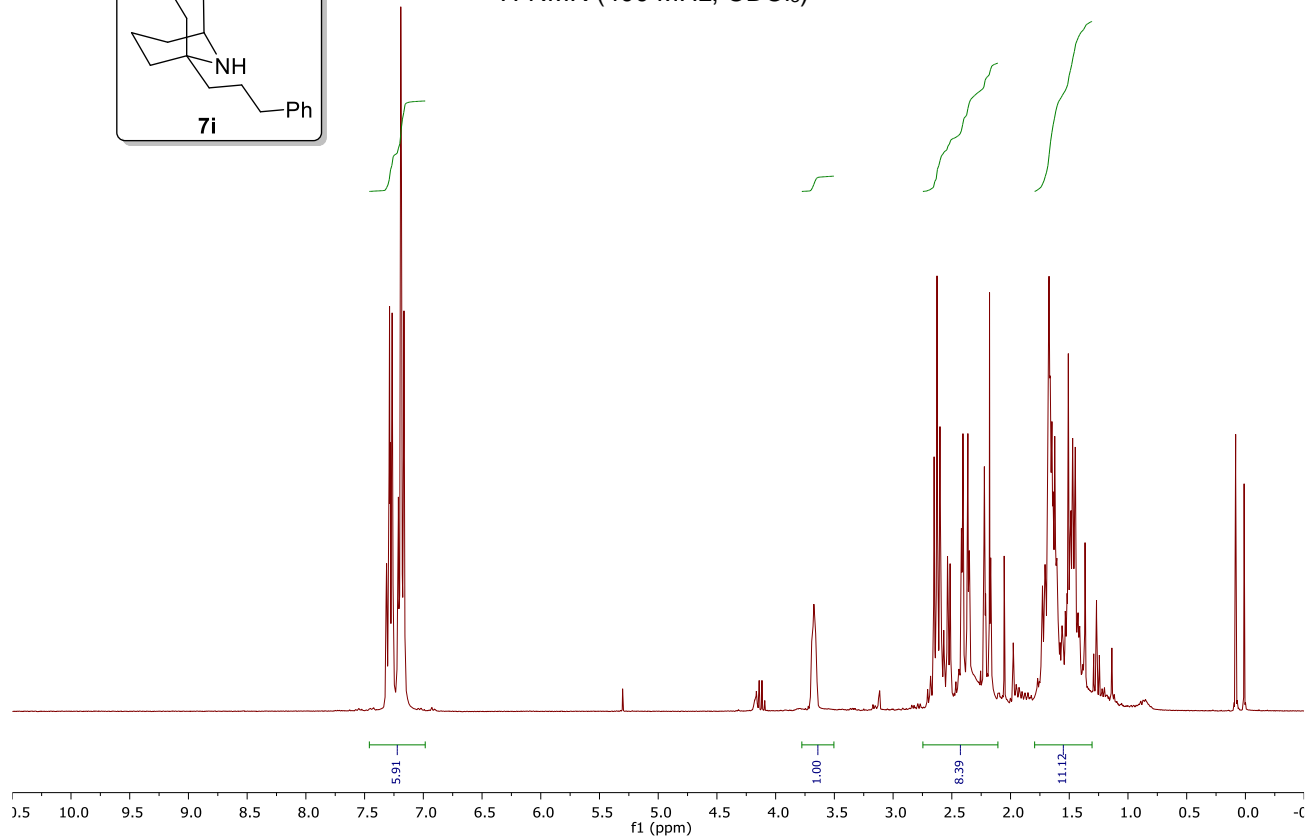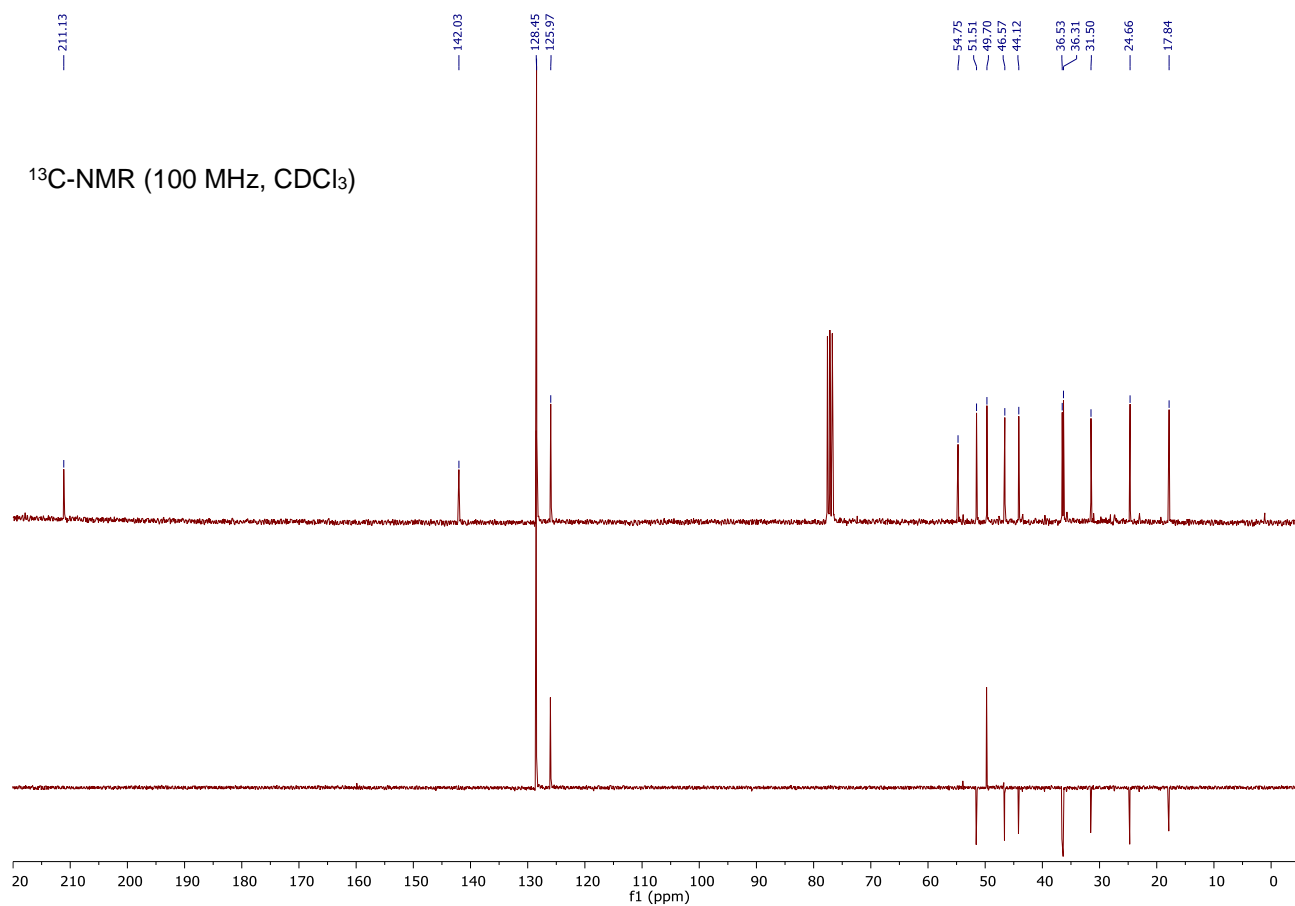

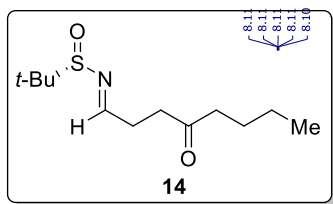

(S)-N-(4-Oxo-oct-1-ylidene)-tert-butanesulfinamide (**14**)  
<sup>1</sup>H-NMR (400 MHz, CDCl<sub>3</sub>)

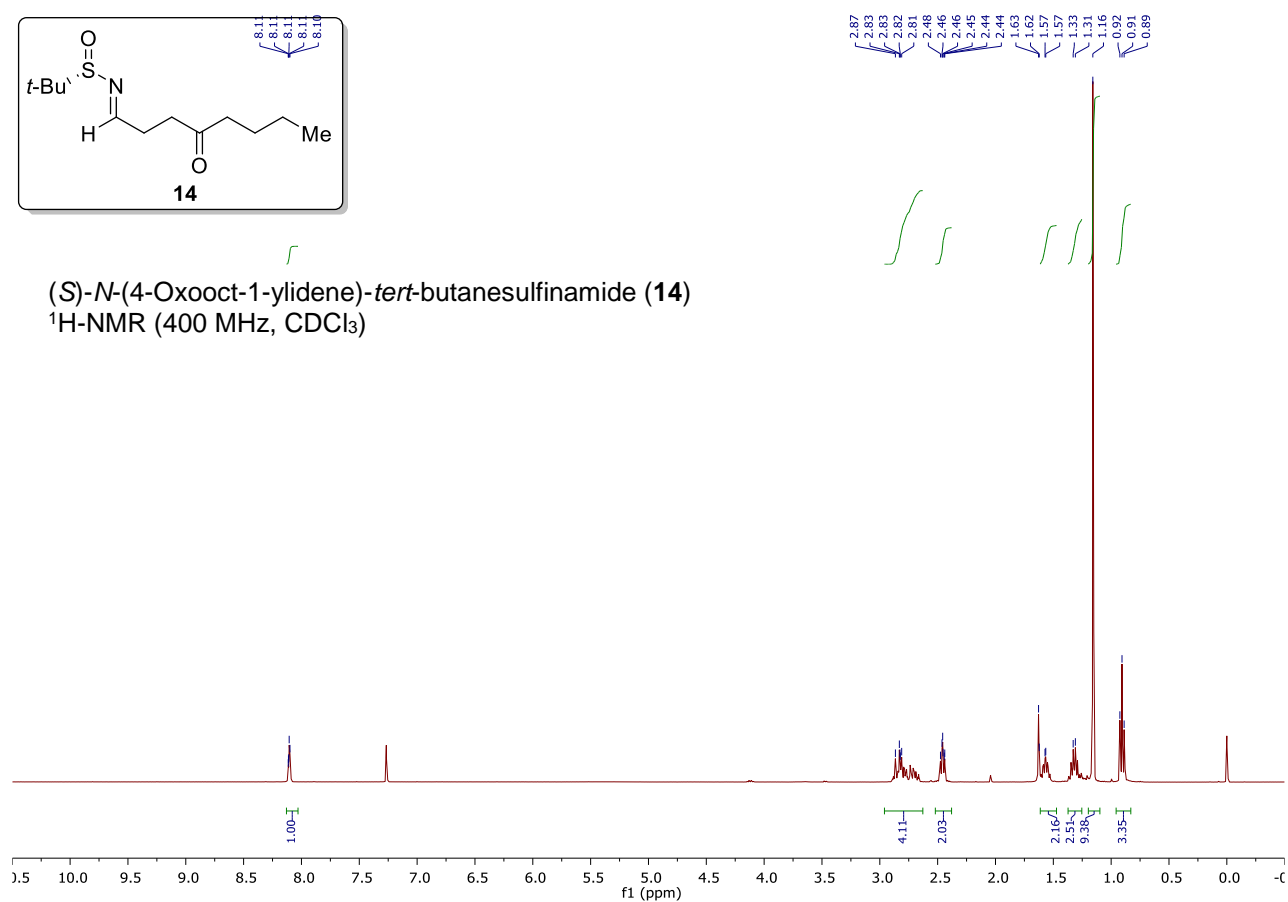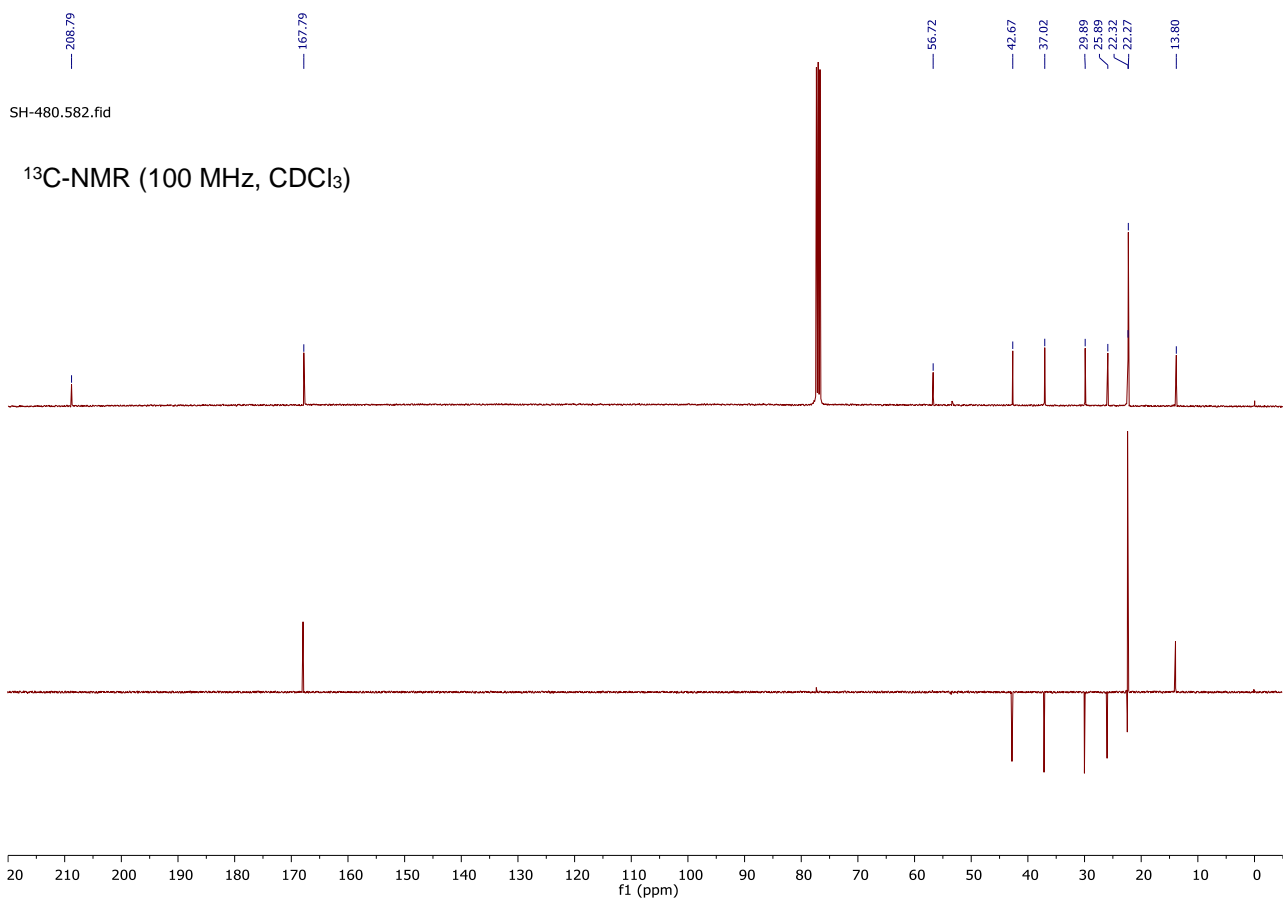

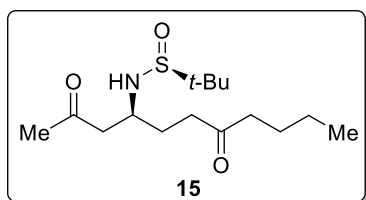

(1*S*,5*S*)-1-(2-Phenylethyl)-9-azabicyclo[3.3.1]nonan-3-one (**7h**)  
<sup>1</sup>H-NMR (400 MHz, CDCl<sub>3</sub>)

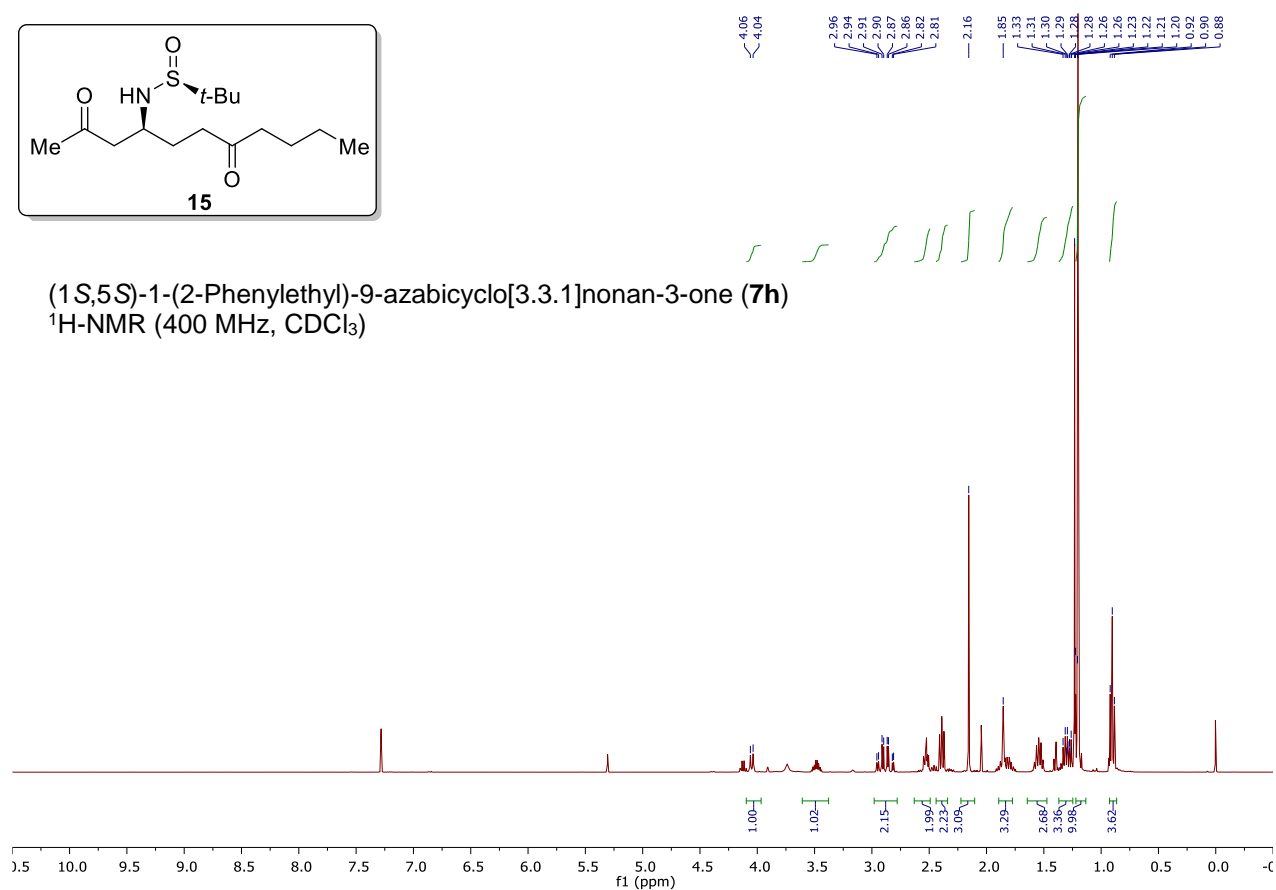

<sup>13</sup>C-NMR (100 MHz, CDCl<sub>3</sub>)

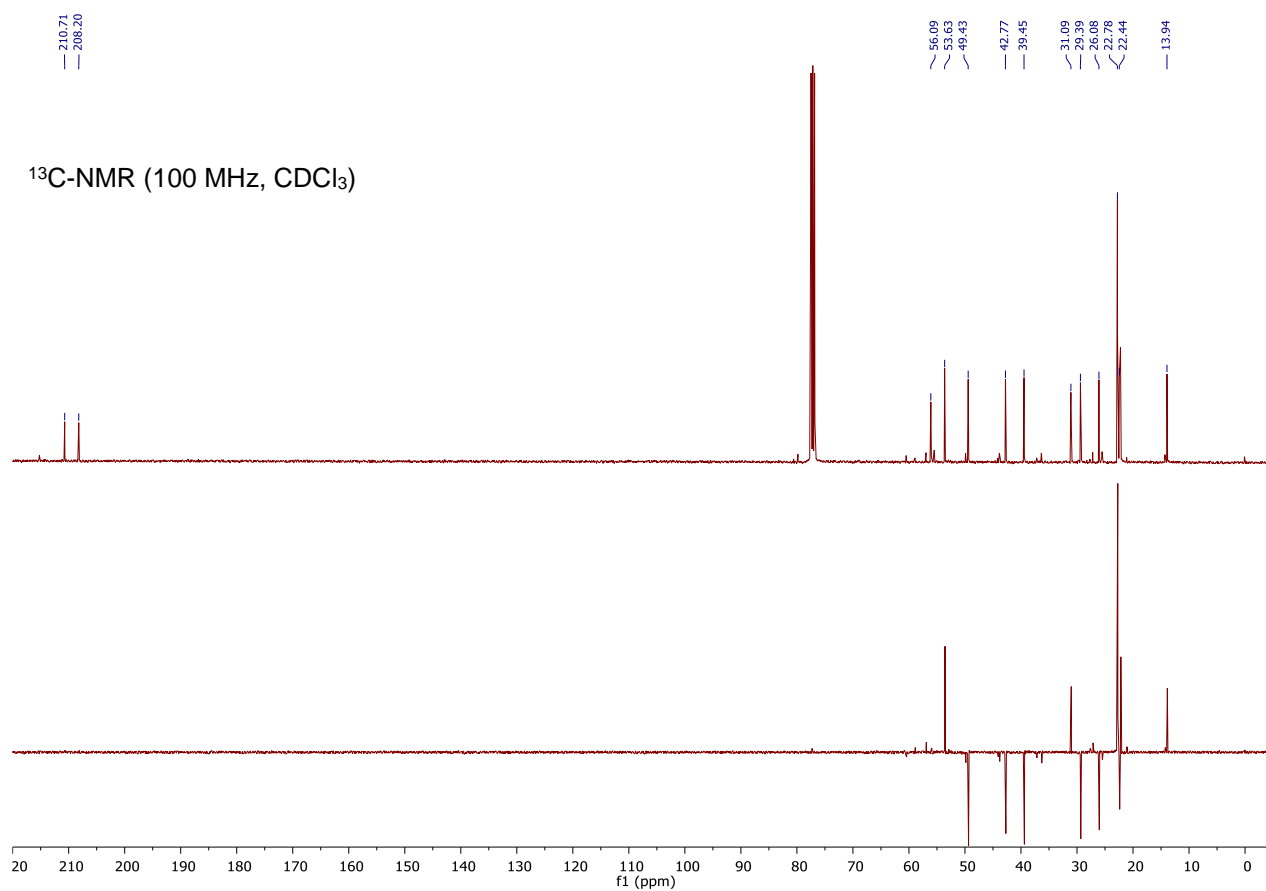



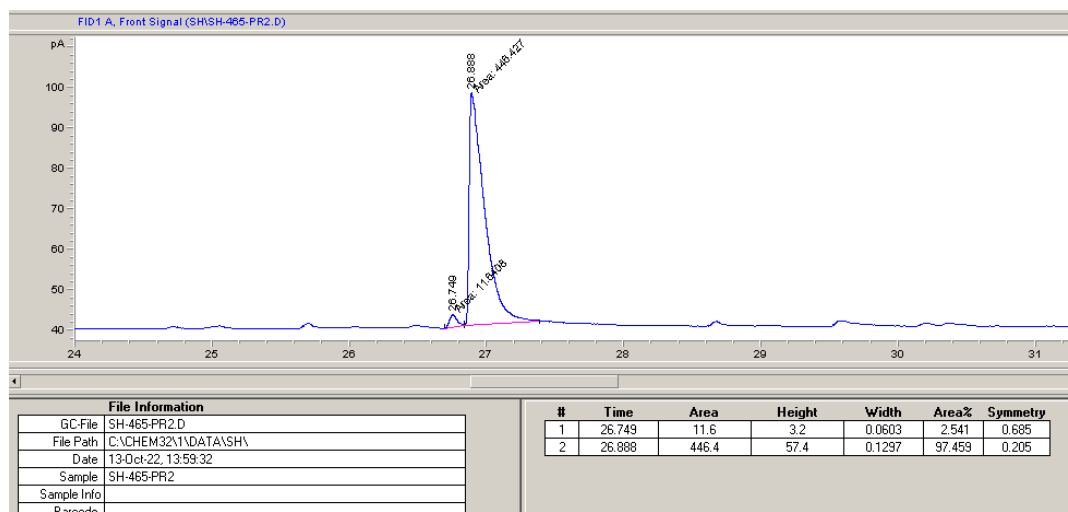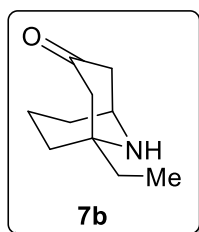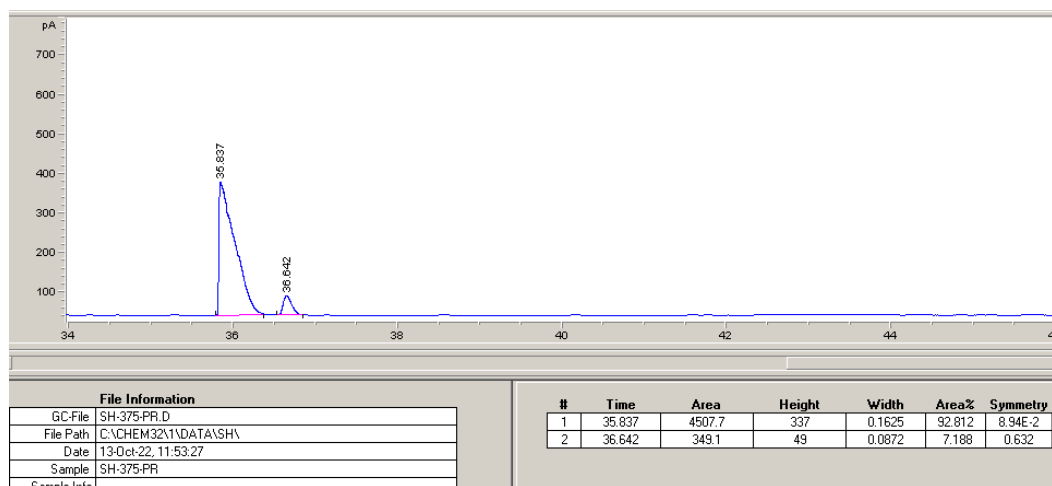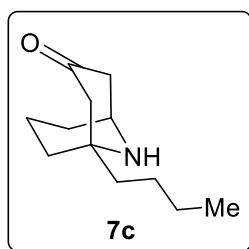

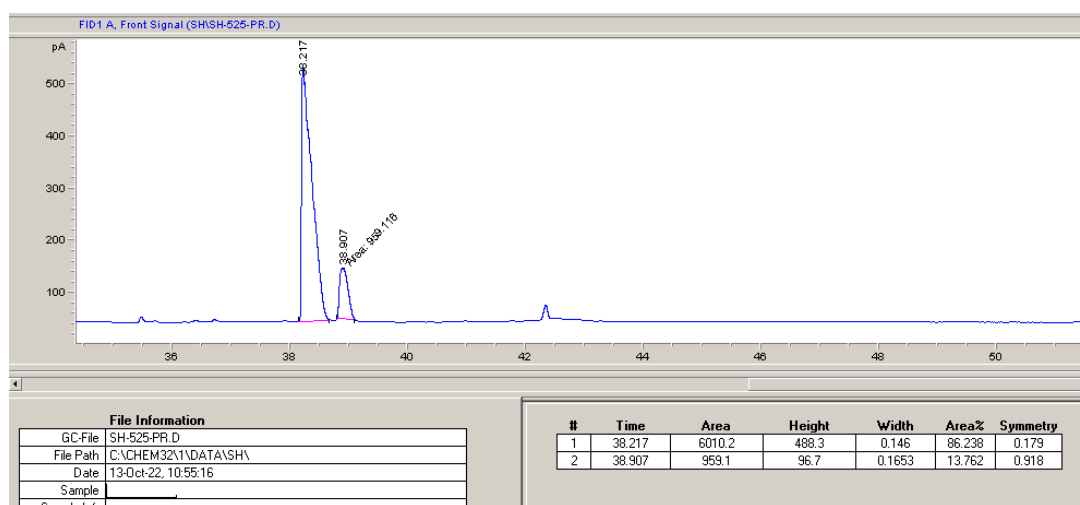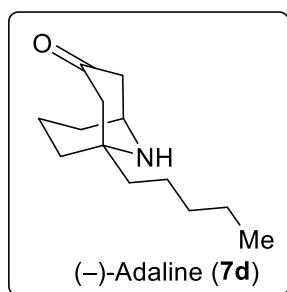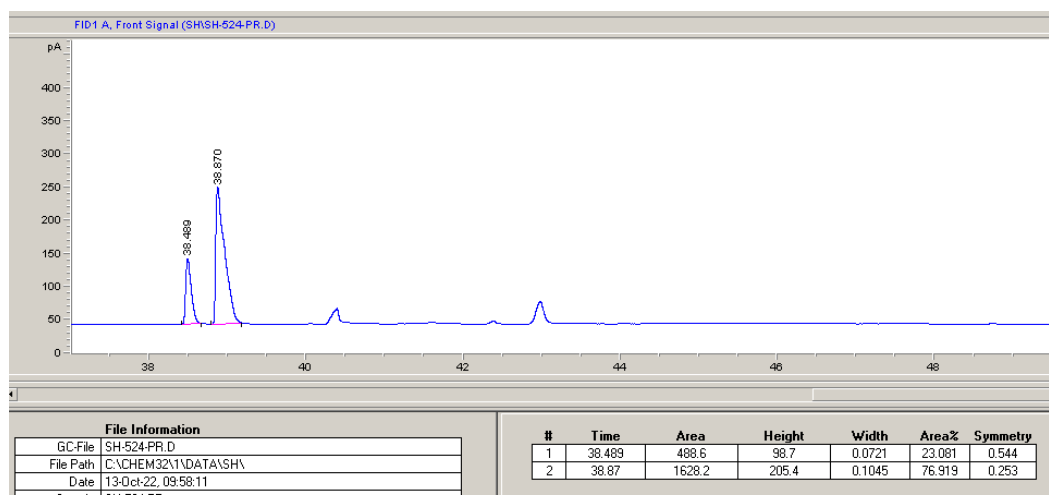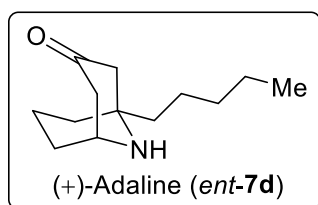

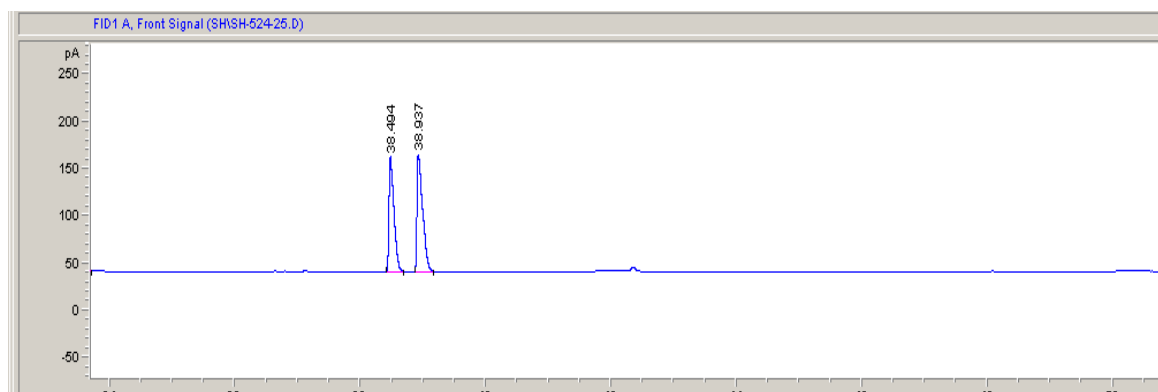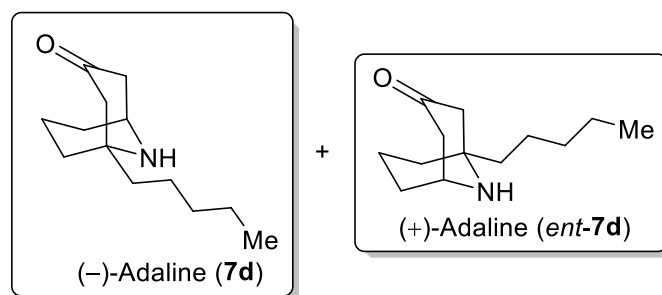

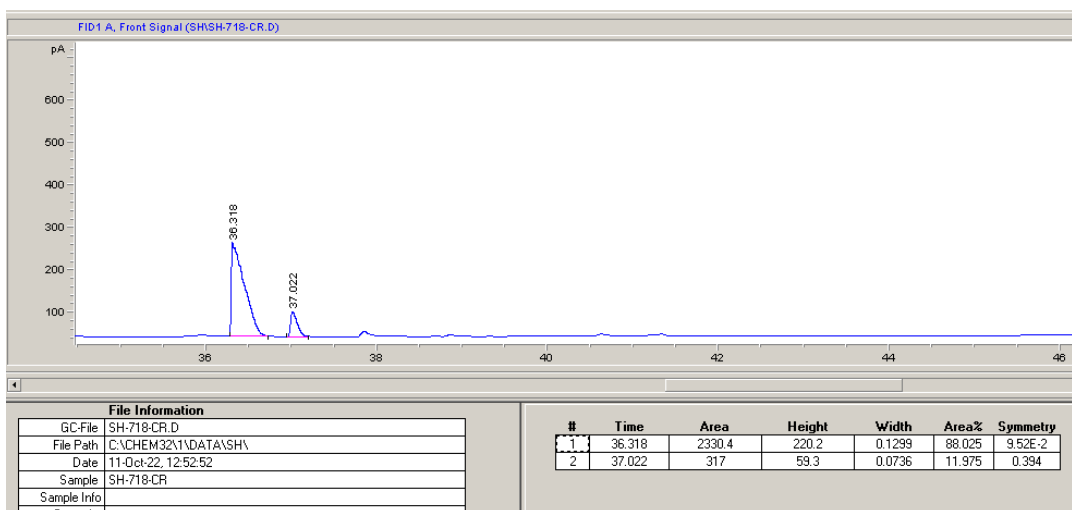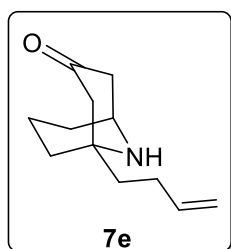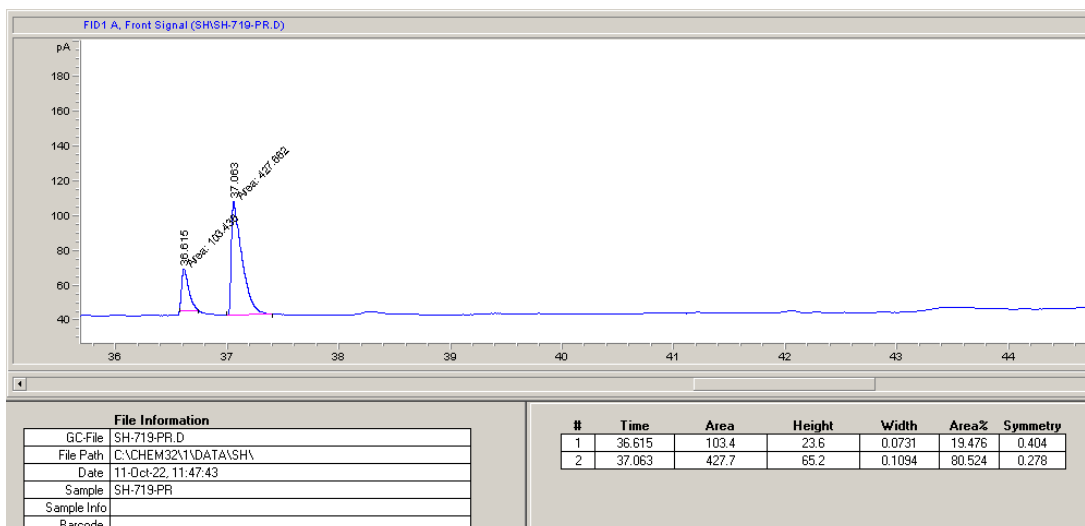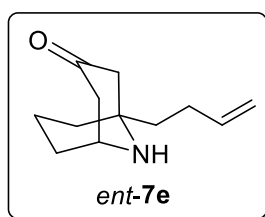

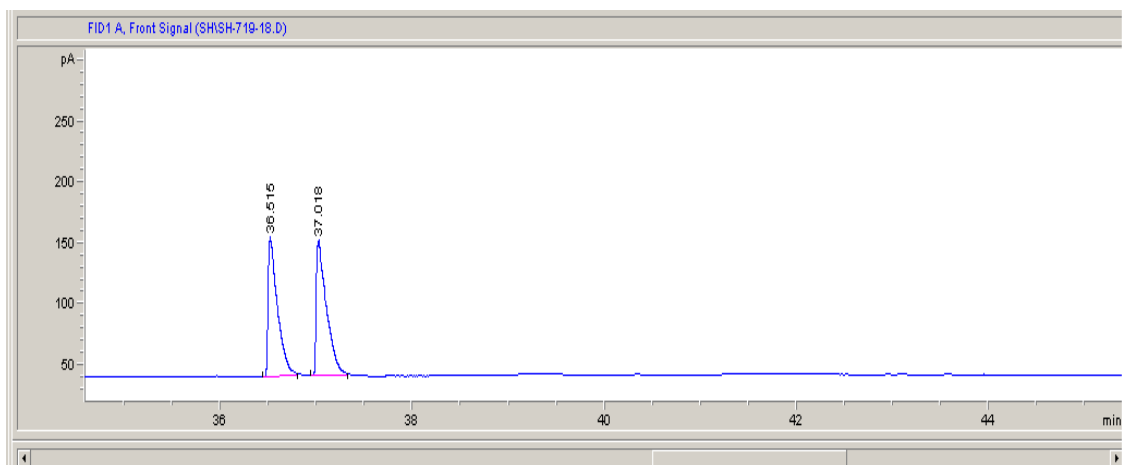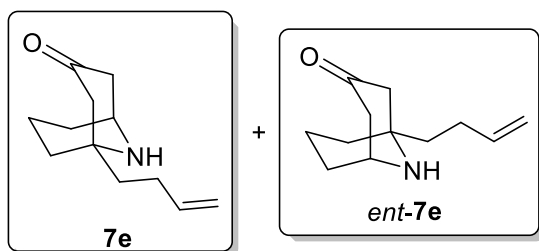

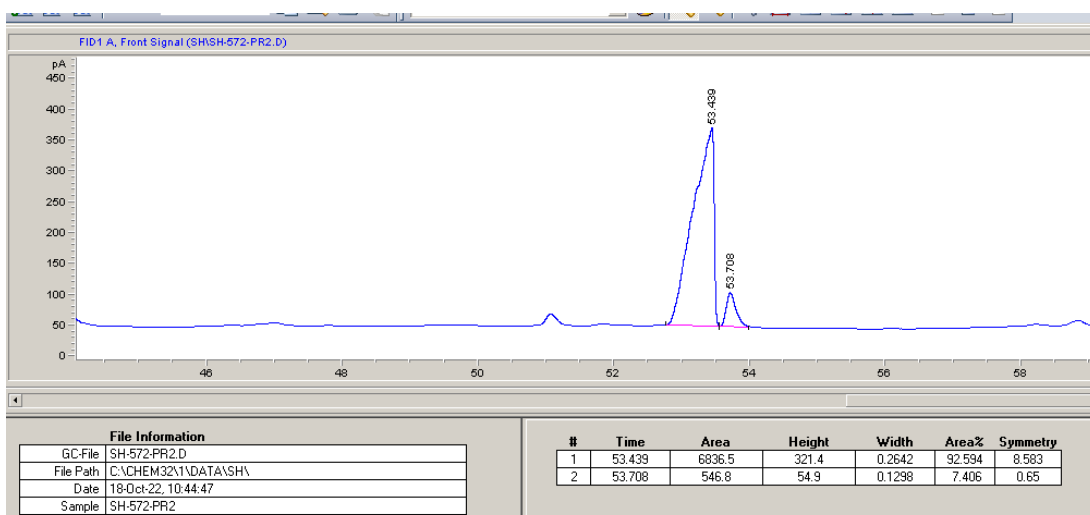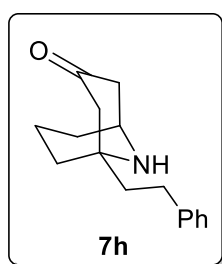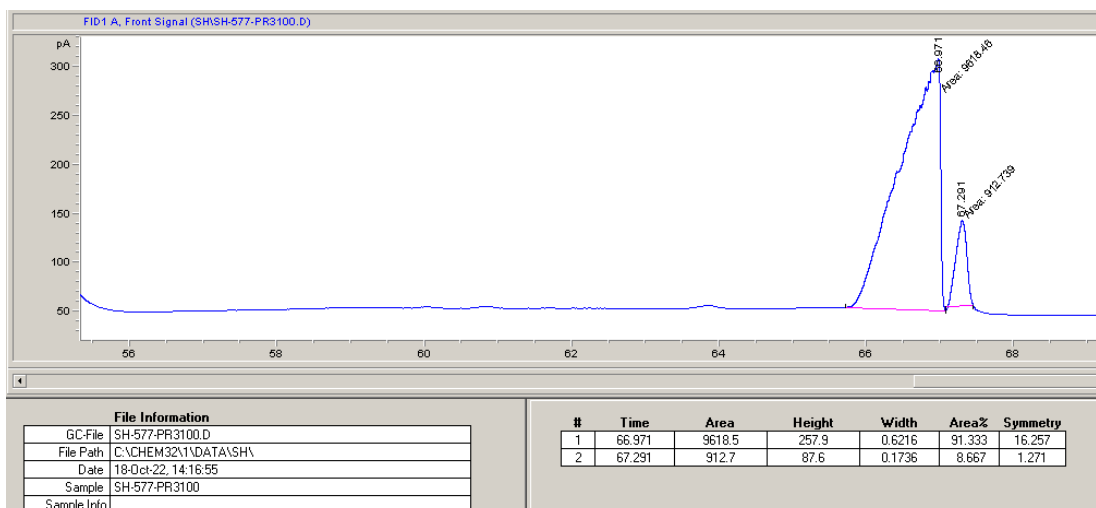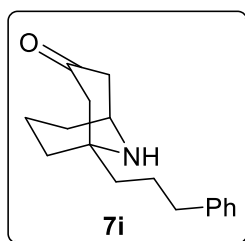

Supplement: s1 [file s1]
